# Supplementary material for: Cobalt(ii/iii), nickel(ii) and copper(ii) coordination clusters employing a monoanionic Schiff base ligand: synthetic, topological and computational mechanistic aspects
Source: Royal Society of Chemistry journal article supplement (doi:10.1039/c5ce01294e), 2015-01-01
Supplement: c5ce01294e1.pdf [file c5ce01294e1.pdf]

## Electronic Supporting Information

### **Cobalt(II/III), Nickel(II) and Copper(II) Coordination Clusters employing a monoanionic Schiff base ligand: Synthetic, topological and computational mechanistic aspects**

Edward Loukopoulos,<sup>a</sup> Benjamin Berkoff,<sup>a</sup> Kieran Griffiths,<sup>a</sup> Victoria Keeble,<sup>a</sup> Vassiliki N. Dokorou,<sup>a</sup> Athanassios C. Tsipis,<sup>\*b</sup> Albert Escuer<sup>\*c</sup> and George E. Kostakis<sup>\*a</sup>

**Table S1.** Crystal data and structure refinement for **1-5**.

| Compound                                              | <b>1</b> ·5MeCN                                                   | <b>2</b> ·5MeCN                                                   | <b>3</b> ·MeCN                                                   | <b>4</b>                                                                                        | <b>5</b>                                                                          |
|-------------------------------------------------------|-------------------------------------------------------------------|-------------------------------------------------------------------|------------------------------------------------------------------|-------------------------------------------------------------------------------------------------|-----------------------------------------------------------------------------------|
| Empirical formula                                     | C <sub>48</sub> H <sub>51</sub> N <sub>11</sub> O <sub>6</sub> Co | C <sub>48</sub> H <sub>51</sub> N <sub>11</sub> O <sub>6</sub> Ni | C <sub>40</sub> H <sub>39</sub> N <sub>7</sub> O <sub>6</sub> Cu | C <sub>78</sub> H <sub>78</sub> Cl <sub>2</sub> Co <sub>4</sub> N <sub>12</sub> O <sub>22</sub> | C <sub>152</sub> H <sub>152</sub> Co <sub>8</sub> N <sub>24</sub> O <sub>41</sub> |
| Formula weight                                        | 936.94                                                            | 936.70                                                            | 777.32                                                           | 1842.14                                                                                         | 3442.41                                                                           |
| Temperature/K                                         | 173.0                                                             | 173.0                                                             | 173.0                                                            | 150                                                                                             | 173                                                                               |
| Crystal system                                        | triclinic                                                         | triclinic                                                         | triclinic                                                        | monoclinic                                                                                      | tetragonal                                                                        |
| Space group                                           | <i>P</i> $\bar{1}$                                                | <i>P</i> $\bar{1}$                                                | <i>P</i> $\bar{1}$                                               | <i>P</i> 2 <sub>1</sub> / <i>c</i>                                                              | I4 <sub>1</sub> / <i>a</i>                                                        |
| <i>a</i> /Å                                           | 12.5772(15)                                                       | 12.5820(5)                                                        | 10.5901(9)                                                       | 23.5066(6)                                                                                      | 15.0627(5)                                                                        |
| <i>b</i> /Å                                           | 13.5174(19)                                                       | 13.4972(7)                                                        | 12.6454(10)                                                      | 12.3910(3)                                                                                      | 15.0627(5)                                                                        |
| <i>c</i> /Å                                           | 13.8758(14)                                                       | 13.9527(5)                                                        | 14.7745(12)                                                      | 29.062(2)                                                                                       | 33.6307(16)                                                                       |
| $\alpha$ /°                                           | 88.395(10)                                                        | 88.824(4)                                                         | 72.448(7)                                                        | 90                                                                                              | 90                                                                                |
| $\beta$ /°                                            | 88.618(9)                                                         | 88.632(3)                                                         | 82.861(7)                                                        | 109.306(8)                                                                                      | 90                                                                                |
| $\gamma$ /°                                           | 89.946(10)                                                        | 89.748(4)                                                         | 88.524(7)                                                        | 90                                                                                              | 90                                                                                |
| Volume/Å <sup>3</sup>                                 | 2357.4(5)                                                         | 2368.29(18)                                                       | 1871.7(3)                                                        | 7988.8(7)                                                                                       | 7630.3(6)                                                                         |
| Z                                                     | 2                                                                 | 2                                                                 | 2                                                                | 4                                                                                               | 2                                                                                 |
| $\rho_{\text{calc}}$ /cm <sup>3</sup>                 | 1.3198                                                            | 1.314                                                             | 1.379                                                            | 1.532                                                                                           | 1.498                                                                             |
| $\mu$ /mm <sup>-1</sup>                               | 0.425                                                             | 0.470                                                             | 0.641                                                            | 0.966                                                                                           | 0.936                                                                             |
| F(000)                                                | 983.1                                                             | 984.0                                                             | 810.0                                                            | 3792.0                                                                                          | 3552.0                                                                            |
| Crystal size/mm <sup>3</sup>                          | 0.32 × 0.18 × 0.12                                                | 0.34 × 0.14 × 0.08                                                | 0.34 × 0.2 × 0.14                                                | 0.14 × 0.04 × 0.01                                                                              | 0.2 × 0.18 × 0.12                                                                 |
| Radiation                                             | Mo K $\alpha$ ( $\lambda$ = 0.71073)                              | Mo K $\alpha$ ( $\lambda$ = 0.71073)                              | Mo K $\alpha$ ( $\lambda$ = 0.71073)                             | Mo K $\alpha$ ( $\lambda$ = 0.71073)                                                            | Mo K $\alpha$ ( $\lambda$ = 0.71073)                                              |
| 2 $\theta$ range for data collection/°                | 6.78 to 58.74                                                     | 5.22 to 58.472                                                    | 5.12 to 58.6                                                     | 6.162 to 54.97                                                                                  | 5.928 to 58.212                                                                   |
| Index ranges                                          | -10 ≤ <i>h</i> ≤ 16, -18 ≤ <i>k</i> ≤ 18, -19 ≤ <i>l</i> ≤ 17     | -16 ≤ <i>h</i> ≤ 16, -17 ≤ <i>k</i> ≤ 18, -18 ≤ <i>l</i> ≤ 18     | -14 ≤ <i>h</i> ≤ 13, -16 ≤ <i>k</i> ≤ 15, -20 ≤ <i>l</i> ≤ 18    | -30 ≤ <i>h</i> ≤ 30, -16 ≤ <i>k</i> ≤ 15, -37 ≤ <i>l</i> ≤ 37                                   | -11 ≤ <i>h</i> ≤ 18, -20 ≤ <i>k</i> ≤ 8, -23 ≤ <i>l</i> ≤ 43                      |
| Reflections collected                                 | 15006                                                             | 21257                                                             | 16550                                                            | 90215                                                                                           | 9400                                                                              |
| Independent reflections                               | 10479 [R <sub>int</sub> = 0.0295, R <sub>sigma</sub> = 0.0618]    | 10852 [R <sub>int</sub> = 0.0283, R <sub>sigma</sub> = 0.0424]    | 8586 [R <sub>int</sub> = 0.0320, R <sub>sigma</sub> = 0.0519]    | 18111 [R <sub>int</sub> = 0.0793, R <sub>sigma</sub> = 0.0695]                                  | 4381 [R <sub>int</sub> = 0.0247, R <sub>sigma</sub> = 0.0330]                     |
| Data/restraints/parameters                            | 10479/0/605                                                       | 10852/0/606                                                       | 8586/0/494                                                       | 18111/48/992                                                                                    | 4381/0/258                                                                        |
| Goodness-of-fit on F <sup>2</sup>                     | 1.025                                                             | 1.031                                                             | 1.039                                                            | 1.028                                                                                           | 1.077                                                                             |
| Final R indexes [ <i>I</i> ≥ 2 $\sigma$ ( <i>I</i> )] | R <sub>1</sub> = 0.0526, wR <sub>2</sub> = 0.1218                 | R <sub>1</sub> = 0.0426, wR <sub>2</sub> = 0.1003                 | R <sub>1</sub> = 0.0381, wR <sub>2</sub> = 0.0847                | R <sub>1</sub> = 0.0690, wR <sub>2</sub> = 0.1874                                               | R <sub>1</sub> = 0.0543, wR <sub>2</sub> = 0.1595                                 |
| Final R indexes [all data]                            | R <sub>1</sub> = 0.0723, wR <sub>2</sub> = 0.1355                 | R <sub>1</sub> = 0.0567, wR <sub>2</sub> = 0.1090                 | R <sub>1</sub> = 0.0503, wR <sub>2</sub> = 0.0917                | R <sub>1</sub> = 0.0995, wR <sub>2</sub> = 0.2090                                               | R <sub>1</sub> = 0.0737, wR <sub>2</sub> = 0.1801                                 |
| Largest diff. peak/hole / e Å <sup>-3</sup>           | 1.64/-0.55                                                        | 0.44/-0.32                                                        | 0.38/-0.38                                                       | 1.79/-1.70                                                                                      | 1.39/-0.45                                                                        |

**Table S2.** Crystal data and structure refinement for **6-9**.

| Compound | <b>6</b> | <b>7</b> ·2MeCN | <b>8</b> ·2MeOH | <b>9</b> ·6MeOH |
|----------|----------|-----------------|-----------------|-----------------|
|----------|----------|-----------------|-----------------|-----------------|

|                                             |                                                                                 |                                                                 |                                                                                  |                                                                                                  |
|---------------------------------------------|---------------------------------------------------------------------------------|-----------------------------------------------------------------|----------------------------------------------------------------------------------|--------------------------------------------------------------------------------------------------|
| Empirical formula                           | C <sub>76</sub> H <sub>76</sub> Co <sub>4</sub> N <sub>12</sub> O <sub>24</sub> | C <sub>42</sub> H <sub>39</sub> CoN <sub>8</sub> O <sub>8</sub> | C <sub>60</sub> H <sub>66</sub> ClN <sub>9</sub> Ni <sub>2</sub> O <sub>16</sub> | C <sub>84</sub> H <sub>102</sub> Cl <sub>2</sub> Cu <sub>4</sub> N <sub>12</sub> O <sub>28</sub> |
| Formula weight                              | 1777.20                                                                         | 842.74                                                          | 1322.08                                                                          | 2052.83                                                                                          |
| Temperature/K                               | 173                                                                             | 100                                                             | 100                                                                              | 173.0                                                                                            |
| Crystal system                              | tetragonal                                                                      | triclinic                                                       | monoclinic                                                                       | monoclinic                                                                                       |
| Space group                                 | I4 <sub>1</sub> /a                                                              | <i>P</i> $\bar{1}$                                              | I2/c                                                                             | P2 <sub>1</sub> /c                                                                               |
| a/Å                                         | 15.0145(4)                                                                      | 12.6956(4)                                                      | 27.0155(19)                                                                      | 23.7809(3)                                                                                       |
| b/Å                                         | 15.0145(4)                                                                      | 14.4449(4)                                                      | 13.5650(9)                                                                       | 19.3947(3)                                                                                       |
| c/Å                                         | 33.6543(11)                                                                     | 22.4981(7)                                                      | 36.028(3)                                                                        | 21.4148(2)                                                                                       |
| $\alpha$ /°                                 | 90                                                                              | 77.797(2)                                                       | 90                                                                               | 90                                                                                               |
| $\beta$ /°                                  | 90                                                                              | 79.842(2)                                                       | 97.0327(8)                                                                       | 97.9199(12)                                                                                      |
| $\gamma$ /°                                 | 90                                                                              | 72.698(3)                                                       | 90                                                                               | 90                                                                                               |
| Volume/Å <sup>3</sup>                       | 7586.9(5)                                                                       | 3821.6(2)                                                       | 13103.5(16)                                                                      | 9782.8(2)                                                                                        |
| Z                                           | 4                                                                               | 4                                                               | 8                                                                                | 4                                                                                                |
| $\rho_{\text{calc}}$ /cm <sup>3</sup>       | 1.556                                                                           | 1.465                                                           | 1.340                                                                            | 1.394                                                                                            |
| $\mu$ /mm <sup>-1</sup>                     | 0.948                                                                           | 0.516                                                           | 0.687                                                                            | 0.992                                                                                            |
| F(000)                                      | 3664.0                                                                          | 1752.0                                                          | 5520.0                                                                           | 4256.0                                                                                           |
| Crystal size/mm <sup>3</sup>                | 0.2 × 0.14 × 0.1                                                                | 0.07 × 0.05 × 0.01                                              | 0.29 × 0.08 × 0.03                                                               | 0.26 × 0.2 × 0.18                                                                                |
| Radiation                                   | MoK $\alpha$ ( $\lambda$ = 0.71073)                                             | MoK $\alpha$ ( $\lambda$ = 0.71073)                             | MoK $\alpha$ ( $\lambda$ = 0.71073)                                              | MoK $\alpha$ ( $\lambda$ = 0.71073)                                                              |
| 2 $\theta$ range for data collection/°      | 7.072 to 58.874                                                                 | 4.374 to 54.968                                                 | 5.158 to 54.944                                                                  | 4.898 to 52.746                                                                                  |
| Index ranges                                | -19 ≤ h ≤ 12, -7 ≤ k ≤ 16, -26 ≤ l ≤ 26                                         | -18 ≤ h ≤ 16, -29 ≤ l ≤ 28                                      | -17 ≤ h ≤ 31, -17 ≤ k ≤ 17, -26 ≤ l ≤ 26                                         | -19 ≤ h ≤ 12, -7 ≤ k ≤ 16, -26 ≤ l ≤ 26                                                          |
| Reflections collected                       | 9913                                                                            | 50559                                                           | 148453                                                                           | 45640                                                                                            |
| Independent reflections                     | 4352 [R <sub>int</sub> = 0.0248, R <sub>sigma</sub> = 0.0408]                   | 17317 [R <sub>int</sub> = 0.0843, R <sub>sigma</sub> = 0.1315]  | 14748 [R <sub>int</sub> = 0.0721, R <sub>sigma</sub> = 0.0460]                   | 19849 [R <sub>int</sub> = 0.0295, R <sub>sigma</sub> = 0.0451]                                   |
| Data/restraints/parameters                  | 4352/0/266                                                                      | 17317/0/1036                                                    | 14748/68/767                                                                     | 19849/146/1156                                                                                   |
| Goodness-of-fit on F <sup>2</sup>           | 1.061                                                                           | 1.023                                                           | 1.040                                                                            | 1.075                                                                                            |
| Final R indexes [I ≥ 2 $\sigma$ (I)]        | R <sub>1</sub> = 0.0515, wR <sub>2</sub> = 0.1477                               | R <sub>1</sub> = 0.0746, wR <sub>2</sub> = 0.1315               | R <sub>1</sub> = 0.0709, wR <sub>2</sub> = 0.2040                                | R <sub>1</sub> = 0.0545, wR <sub>2</sub> = 0.1529                                                |
| Final R indexes [all data]                  | R <sub>1</sub> = 0.0770, wR <sub>2</sub> = 0.1631                               | R <sub>1</sub> = 0.1450, wR <sub>2</sub> = 0.1562               | R <sub>1</sub> = 0.0912, wR <sub>2</sub> = 0.2176                                | R <sub>1</sub> = 0.0779, wR <sub>2</sub> = 0.1682                                                |
| Largest diff. peak/hole / e Å <sup>-3</sup> | 0.74/-0.74                                                                      | 1.09/-1.62                                                      | 1.80/-0.69                                                                       | 0.85/-0.76                                                                                       |

**Table S3.** Selected bond lengths (Å) for **2**.

|         |            |
|---------|------------|
| Ni - O2 | 2.0105(12) |
| Ni - O3 | 2.2125(13) |
| Ni - O5 | 2.0101(13) |
| Ni - O6 | 2.2045(13) |
| Ni - N1 | 2.0333(14) |
| Ni - N4 | 2.0335(15) |

**Table S4.** Hydrogen bonds for **5**.

| D-H ··· A                | D-H [Å] | H ··· A [Å] | D ··· A [Å] | D-H ··· A [°] |
|--------------------------|---------|-------------|-------------|---------------|
| O5-H5A···O2 <sup>1</sup> | 0.85    | 1.96        | 2.761(4)    | 157           |

<sup>1</sup> 5/4-Y, 1/4+X, 5/4-Z**Table S5.** Hydrogen bonds for **6**.

| D-H ··· A                | D-H [Å] | H ··· A [Å] | D ··· A [Å] | D-H ··· A [°] |
|--------------------------|---------|-------------|-------------|---------------|
| O5-H5A···O2 <sup>1</sup> | 0.84    | 2.04        | 2.707(7)    | 137           |
| O6-H6···O3 <sup>2</sup>  | 0.84    | 1.90        | 2.736(14)   | 153           |

<sup>1</sup>-1/4+Y, 5/4-X, 1/4-Z; <sup>2</sup>3/2-X, 3/2-Y, 1/2-Z**Table S6.** Selected bond lengths (Å) and angles (°) for **8**.

|            |            |
|------------|------------|
| Ni1–O5     | 1.984(3)   |
| Ni1–O6     | 2.098(3)   |
| Ni1–O8     | 2.056(2)   |
| Ni1–O10    | 2.102(2)   |
| Ni1–N4     | 2.086(3)   |
| Ni1–N7     | 2.076(3)   |
| Ni2–O2     | 1.993(2)   |
| Ni2–O3     | 2.143(2)   |
| Ni2–O4     | 2.295(3)   |
| Ni2–O5     | 1.986(2)   |
| Ni2–O8     | 2.117(2)   |
| Ni2–N1     | 2.020(3)   |
| Ni1–O5–Ni2 | 102.72(10) |
| Ni1–O8–Ni2 | 95.99(9)   |

**Table S7.** Hydrogen bonds for **8**.

| D-H ··· A                  | D-H [Å] | H ··· A [Å] | D ··· A [Å] | D-H ··· A [°] |
|----------------------------|---------|-------------|-------------|---------------|
| O10-H10···O2               | 0.85(3) | 1.93(3)     | 2.677(4)    | 146(3)        |
| O11-H11···O12 <sup>1</sup> | 0.84    | 2.12        | 2.805(10)   | 139           |
| O12-H12···O18              | 0.84    | 2.06        | 2.708(8)    | 134           |

<sup>1</sup>1-X, 2-Y, 1-Z



**Table S8.** Selected bond lengths (Å) and angles (°) for **9**.

---

|             |            |
|-------------|------------|
| Cu1–O14     | 1.917(2)   |
| Cu1–O3      | 2.031(2)   |
| Cu1–O2      | 1.966(2)   |
| Cu1–O11     | 2.6711(2)  |
| Cu1–O9      | 2.318(2)   |
| Cu1–N1      | 1.988(3)   |
| Cu2–O14     | 1.961(2)   |
| Cu2–O13     | 2.455(2)   |
| Cu2–O5      | 1.903(2)   |
| Cu2–O11     | 2.056(2)   |
| Cu2–O10     | 2.424(2)   |
| Cu2–N4      | 1.976(3)   |
| Cu3–O13     | 1.959(2)   |
| Cu3–O2      | 2.045(2)   |
| Cu3–O1      | 2.412(2)   |
| Cu3–O8      | 1.900(2)   |
| Cu3–N7      | 1.978(3)   |
| Cu4–O13     | 1.912(2)   |
| Cu4–O12     | 2.032(2)   |
| Cu4–O2      | 2.659(2)   |
| Cu4–O6      | 2.319(2)   |
| Cu4–O11     | 1.960(2)   |
| Cu4–N10     | 1.986(3)   |
| Cu4–O13–Cu3 | 115.28(10) |
| Cu2–O13–Cu4 | 93.11(8)   |
| Cu2–O13–Cu3 | 92.68(8)   |
| Cu2–O14–Cu3 | 92.58(8)   |
| Cu1–O14–Cu2 | 115.78(10) |
| Cu1–O14–Cu3 | 92.71(8)   |
| Cu4–O2–Cu3  | 87.04(8)   |
| Cu1–O2–Cu3  | 105.23(10) |
| Cu1–O2–Cu4  | 98.52(8)   |
| Cu1–O11–Cu4 | 98.28(8)   |
| Cu1–O11–Cu2 | 87.05(7)   |
| Cu4–O11–Cu2 | 105.27(10) |
| Cu1....Cu2  | 3.286(6)   |
| Cu1....Cu3  | 3.187(6)   |
| Cu1....Cu4  | 3.533(7)   |
| Cu2....C3   | 3.212(6)   |
| Cu2....C4   | 3.193(6)   |
| Cu3....Cu4  | 3.270(6)   |

---

**Table S9.** Hydrogen bonds for **9**.

| D-H···A                      | D-H [Å] | H···A [Å] | D···A [Å] | D-H···A [°] |
|------------------------------|---------|-----------|-----------|-------------|
| O17-H17A···O7AA              | 0.84    | 1.89      | 2.590(12) | 140         |
| O15-H15A···O5AA <sup>1</sup> | 0.84    | 1.96      | 2.736(14) | 153         |
| O107-H107···O17 <sup>2</sup> | 0.84    | 2.06      | 2.836(6)  | 153         |
| O139-H139···O15 <sup>3</sup> | 0.84    | 2.15      | 2.919(9)  | 152         |

<sup>1</sup>1-X, -Y, 1-Z; <sup>2</sup>X, 1/2-Y, -1/2+Z; <sup>3</sup>X, 1/2-Y, 1/2+Z

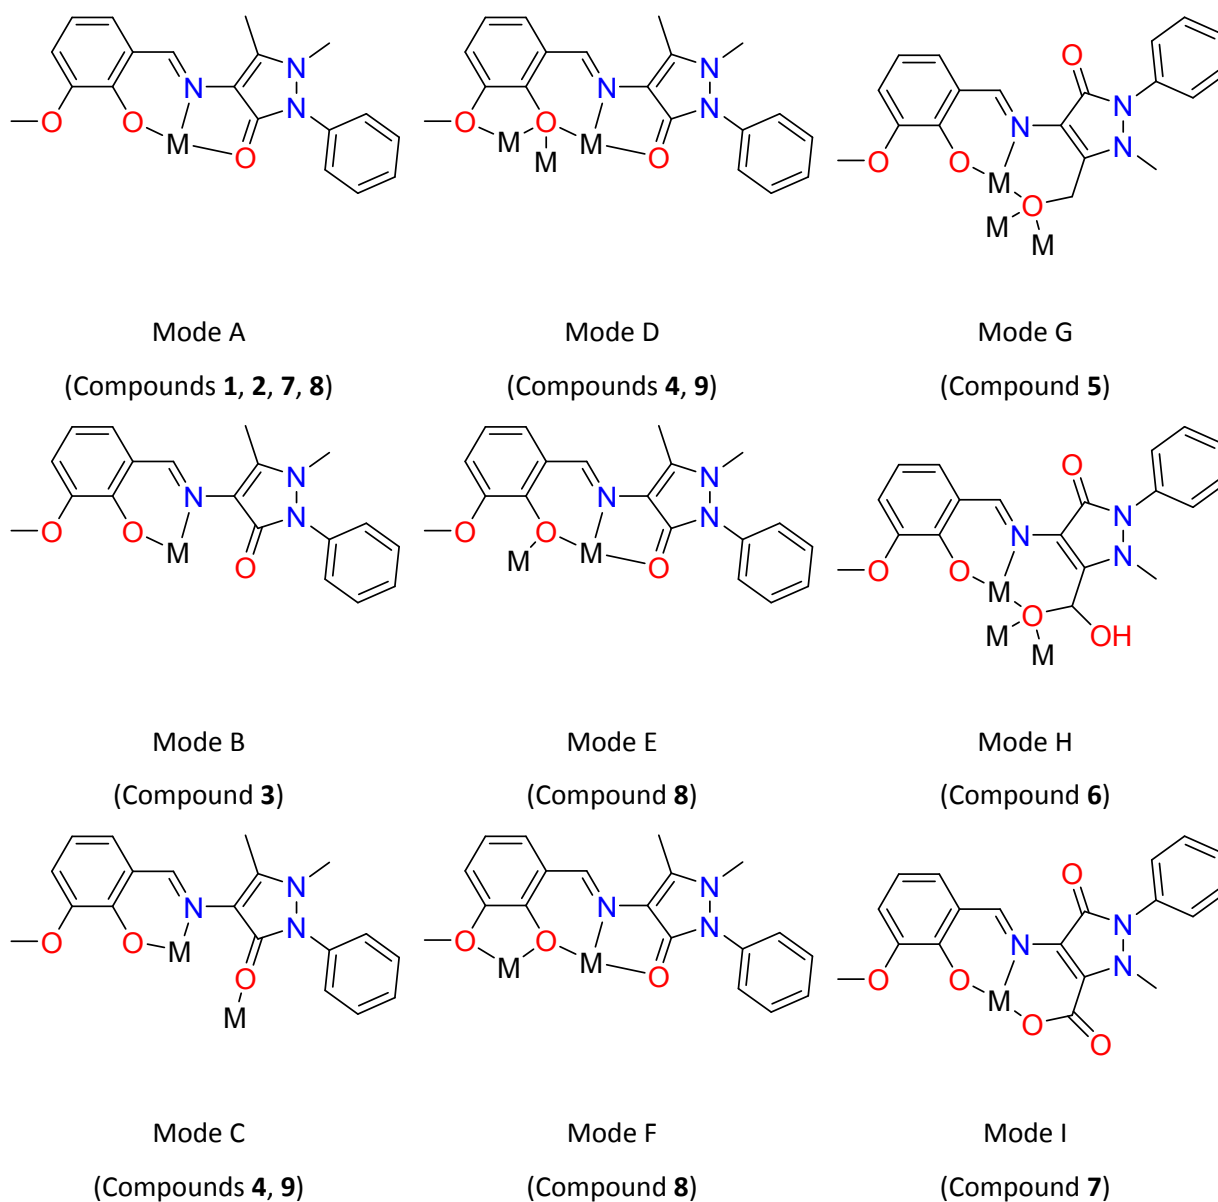**Scheme S1.** The coordination modes of the ligands HL<sup>1</sup> (modes A-F), H<sub>2</sub>L<sup>2</sup> (mode G), H<sub>3</sub>L<sup>3</sup> (mode H) and H<sub>2</sub>L<sup>4</sup> (mode I).

**Table S10.** Selected bond lengths (Å) and angles (°) for **4**, **5**, **6**.

| <b>4</b>    |            | <b>5</b>                              |            | <b>6</b>                              |            |
|-------------|------------|---------------------------------------|------------|---------------------------------------|------------|
| Co1–O2      | 1.920(3)   | Co1–O2                                | 1.9884(19) | Co1–O2                                | 1.981(2)   |
| Co1–O4      | 2.303(2)   | Co1–O4 <sup>1</sup>                   | 2.1592(18) | Co1–O4 <sup>1</sup>                   | 2.1719(19) |
| Co1–O5      | 2.042(2)   | Co1–O4                                | 2.0279(18) | Co1–O4                                | 2.030(2)   |
| Co1–O11     | 2.336(2)   | Co1–O4 <sup>2</sup>                   | 2.1617(17) | Co1–O4 <sup>2</sup>                   | 2.182(2)   |
| Co1–O13     | 2.025(2)   | Co1–O5                                | 2.107(2)   | Co1–O6                                | 2.106(2)   |
| Co2–O3      | 2.086(3)   | Co1 <sup>3</sup> –O4                  | 2.1615(17) | Co1 <sup>3</sup> –O4                  | 2.1719(19) |
| Co2–O5      | 2.090(2)   | Co1 <sup>1</sup> –O4                  | 2.1592(17) | Co1 <sup>2</sup> –O4                  | 2.182(2)   |
| Co2–O6      | 2.098(2)   | Co1–O4–Co1 <sup>2</sup>               | 100.30(8)  | Co1–O4–Co1 <sup>3</sup>               | 100.04(8)  |
| Co2–O13     | 2.079(3)   | Co1–O4–Co1 <sup>3</sup>               | 99.82(7)   | Co1 <sup>3</sup> –O4–Co1 <sup>2</sup> | 95.42(7)   |
| Co2–O14     | 2.064(2)   | Co1 <sup>3</sup> –O4–Co1 <sup>2</sup> | 95.81(7)   | Co1–O4–Co1 <sup>2</sup>               | 100.00(9)  |
| Co3–O8      | 1.941(3)   | Co1....Co1 <sup>1</sup>               | 3.216(3)   | Co1....Co1 <sup>1</sup>               | 3.221(2)   |
| Co3–O10     | 2.412(3)   | Co1....Co1 <sup>2</sup>               | 3.207(3)   | Co1....Co1 <sup>2</sup>               | 3.228(2)   |
| Co3–O11     | 2.059(2)   | Symmetry                              |            | Symmetry                              |            |
| Co3–O13     | 2.145(3)   | Operators:                            |            | Operators:                            |            |
| Co3–O14     | 2.091(3)   | <sup>1</sup> 1-X,3/2-Y,+Z             |            | <sup>1</sup> 5/4-Y,1/4+X,1/4-Z        |            |
| Co4–O5      | 2.196(2)   | <sup>2</sup> -1/4+Y,5/4-X,5/4-Z       |            | <sup>2</sup> 1-X,3/2-Y,+Z             |            |
| Co4–O9      | 2.053(3)   | <sup>3</sup> 5/4-Y,1/4+X,5/4-Z        |            | <sup>3</sup> -1/4+Y,5/4-X,1/4-Z       |            |
| Co4–O11     | 2.028(2)   |                                       |            |                                       |            |
| Co4–O12     | 2.072(3)   |                                       |            |                                       |            |
| Co4–O14     | 2.032(2)   |                                       |            |                                       |            |
| Co1–O13–Co2 | 94.97(10)  |                                       |            |                                       |            |
| Co1–O13–Co2 | 104.92(11) |                                       |            |                                       |            |
| Co2–O13–Co3 | 98.96(10)  |                                       |            |                                       |            |
| Co1–O5–Co2  | 94.13(10)  |                                       |            |                                       |            |
| Co1–O5–Co4  | 104.42(10) |                                       |            |                                       |            |
| Co2–O5–Co4  | 95.30(10)  |                                       |            |                                       |            |
| Co3–O11–Co1 | 97.40(10)  |                                       |            |                                       |            |
| Co4–O11–Co1 | 100.07(10) |                                       |            |                                       |            |
| Co4–O11–Co3 | 95.18(10)  |                                       |            |                                       |            |
| Co3–O14–Co2 | 101.24(10) |                                       |            |                                       |            |
| Co4–O14–Co3 | 94.09(10)  |                                       |            |                                       |            |
| Co4–O14–Co2 | 101.34(10) |                                       |            |                                       |            |
| Co1....Co2  | 3.026(8)   |                                       |            |                                       |            |
| Co1....Co3  | 3.306(9)   |                                       |            |                                       |            |
| Co1....Co4  | 3.350(7)   |                                       |            |                                       |            |
| Co2....Co3  | 3.211(8)   |                                       |            |                                       |            |
| Co2....Co4  | 3.168(8)   |                                       |            |                                       |            |
| Co3....Co4  | 3.018(8)   |                                       |            |                                       |            |

**Synthesis of [Co<sup>III</sup><sub>2</sub>Co<sup>II</sup><sub>2</sub>(MeO)<sub>4</sub>(L<sup>5</sup>)<sub>2</sub>Cl<sub>2</sub>].** 0.2 mmol (0.048 g) of HL<sup>1</sup> and 0.3 mmol (0.072 g) of CoCl<sub>2</sub>·6H<sub>2</sub>O were dissolved in 20 ml MeOH while stirring. To this, 0.54 mmol (75 μL) of Et<sub>3</sub>N were added. The resulting solution was stirred for a further 5 minutes, filtrated, then left to evaporate slowly. Large red block crystals were formed within 3 days. Yield: 62% (based on Co).



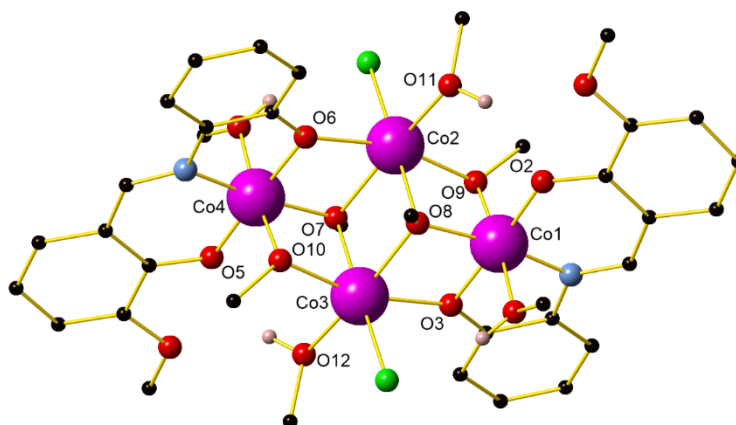

**Fig S4.** The structure of  $[\text{Co}^{\text{III}}_2\text{Co}^{\text{II}}_2(\text{MeO})_4(\text{L}^5)_2\text{Cl}_2]$ . Certain H atoms are omitted for clarity. Color code Co (pink), O (red), C (black), N (blue), Cl (green), H (light pink).

**Table S11.** Crystal data and structure refinement for  $[\text{Co}^{\text{III}}_2\text{Co}^{\text{II}}_2(\text{MeO})_4(\text{L}^5)_2\text{Cl}_2]$ .

|                                               |                                                                           |
|-----------------------------------------------|---------------------------------------------------------------------------|
| Empirical formula                             | $\text{C}_{36}\text{H}_{50}\text{Cl}_2\text{Co}_4\text{N}_2\text{O}_{14}$ |
| Formula weight                                | 1041.40                                                                   |
| Temperature/K                                 | 173                                                                       |
| Crystal system                                | monoclinic                                                                |
| Space group                                   | $P2_1/n$                                                                  |
| $a/\text{\AA}$                                | 11.7862(5)                                                                |
| $b/\text{\AA}$                                | 21.7148(8)                                                                |
| $c/\text{\AA}$                                | 16.7640(6)                                                                |
| $\alpha/^\circ$                               | 90                                                                        |
| $\beta/^\circ$                                | 101.320(4)                                                                |
| $\gamma/^\circ$                               | 90                                                                        |
| Volume/ $\text{\AA}^3$                        | 4207.0(3)                                                                 |
| Z                                             | 4                                                                         |
| $\rho_{\text{calc}}/\text{g/cm}^3$            | 1.644                                                                     |
| $\mu/\text{mm}^{-1}$                          | 1.743                                                                     |
| F(000)                                        | 2136.0                                                                    |
| Crystal size/ $\text{mm}^3$                   | $0.24 \times 0.18 \times 0.14$                                            |
| Radiation                                     | $\text{MoK}\alpha$ ( $\lambda = 0.71073$ )                                |
| $2\theta$ range for data collection/ $^\circ$ | 6.642 to 52.744                                                           |
| Index ranges                                  | $-14 \leq h \leq 14, -27 \leq k \leq 26, -18 \leq l \leq 20$              |
| Reflections collected                         | 19374                                                                     |
| Independent reflections                       | 8574 [ $R_{\text{int}} = 0.0378, R_{\text{sigma}} = 0.0495$ ]             |
| Data/restraints/parameters                    | 8574/12/536                                                               |
| Goodness-of-fit on $F^2$                      | 1.039                                                                     |
| Final R indexes [ $I \geq 2\sigma(I)$ ]       | $R_1 = 0.0372, wR_2 = 0.0850$                                             |
| Final R indexes [all data]                    | $R_1 = 0.0517, wR_2 = 0.0938$                                             |
| Largest diff. peak/hole / $e \text{\AA}^{-3}$ | 0.44/-0.38                                                                |

**Table S12.** Cartesian coordinates and energies of the L<sup>n</sup> (n = 1-4) ligands, the reactant, intermediate, transition state and product cobalt complexes located on the potential energy surfaces of the transformations undergoing the coordinated ligands.

[L<sup>1</sup>]<sup>-</sup>

O,0,-1.6500877491,4.9253508277,0.9460709273  
O,0,-0.2168806217,2.7209625986,0.8261113838  
O,0,1.146425912,-1.8982432712,-0.6374354311  
N,0,1.5765304158,1.0447856594,-0.7696555294  
N,0,3.3566631753,-2.0136693617,-1.3593524589  
N,0,4.3977151188,-1.0992718839,-1.5600618395  
C,0,-2.4185869037,6.100719346,1.0207031012  
H,0,-2.9379369812,6.0729000084,1.9805551341  
H,0,-3.1615456175,6.1563867418,0.2131599869  
H,0,-1.7929061724,7.0028925642,0.9783117825  
C,0,-0.9061015729,4.7396058261,-0.1864426778  
C,0,-0.8634712524,5.6225369753,-1.2387816042  
H,0,-1.4424731151,6.5411188615,-1.2100730536  
C,0,-0.0641454929,5.3509326073,-2.3780415777  
H,0,-0.0388062163,6.0601780742,-3.1997780376  
C,0,0.6651269228,4.1899876769,-2.4183968088  
H,0,1.2826010414,3.9686130778,-3.288704947  
C,0,0.6481174324,3.2457835583,-1.3567426843  
C,0,-0.1463964846,3.4855465052,-0.1662898762  
C,0,1.4613457041,2.0772942493,-1.5471238657  
H,0,2.0245547262,2.0885717598,-2.4963065394  
C,0,2.4958620401,0.0750493311,-1.1293236865  
C,0,3.8146978978,0.1690177062,-1.4760370794  
C,0,2.1819830222,-1.34691245,-1.0004283327  
C,0,4.6624775589,1.3728275807,-1.6823064689  
H,0,5.6426221504,1.2423375964,-1.2128677007  
H,0,4.1737128869,2.2420554587,-1.2361689291  
H,0,4.8254007623,1.5950098644,-2.7429774864  
C,0,5.1825884849,-1.3803558621,-2.7635182724  
H,0,5.6217789729,-2.3757814618,-2.6834516501  
H,0,5.9932851456,-0.6534052551,-2.8218851925  
H,0,4.5682825845,-1.3223245601,-3.6708114855  
C,0,3.6718959001,-3.33748707,-0.9963956324  
C,0,4.9192335954,-3.6493925093,-0.4458931219  
H,0,5.6398391581,-2.8566649986,-0.2743613798  
C,0,5.2152159546,-4.9665303634,-0.1088865023  
H,0,6.1874733034,-5.2003705045,0.3151652793  
C,0,4.2729113834,-5.9744972637,-0.2976689754  
H,0,4.5063831585,-7.0000728063,-0.0284835151  
C,0,3.0277419013,-5.6546882607,-0.8358383296  
H,0,2.2855098872,-6.4327229701,-0.9895550881  
C,0,2.7239256758,-4.3465675483,-1.1969827137  
H,0,1.7600363069,-4.0940060544,-1.6205491215

Sum of electronic and zero-point Energies=,, -1123.274642  
Sum of electronic and thermal Energies=,,, -1123.252498  
Sum of electronic and thermal Enthalpies=,,, -1123.251554  
Sum of electronic and thermal Free Energies=,, -1123.326791

[L<sup>2</sup>]

O,0,-5.6442145713,-1.6866194502,0.6009934598  
O,0,-3.0150125539,-1.614216736,0.6891552337  
O,0,1.7425688587,-1.7576355229,-0.8717614701  
N,0,-0.5817144899,-0.1307368525,0.0256200291  
N,0,2.7293608883,1.3019993768,0.4510272209  
N,0,2.9846276765,0.0942892211,-0.2071175264  
C,0,-7.0494547161,-1.7330510522,0.5639852603  
H,0,-7.4363202944,-1.611795978,-0.4571424853  
H,0,-7.3385235383,-2.7164273695,0.9396582678  
H,0,-7.5016718917,-0.959646994,1.199951441  
C,0,-5.0487061923,-0.5352673962,0.1662221594  
C,0,-5.7313107692,0.5646394793,-0.2939834802  
H,0,-6.8168550277,0.5629143452,-0.3309006964  
C,0,-5.0323189678,1.7208277973,-0.7266499978  
H,0,-5.5875658434,2.5832565524,-1.0828333419  
C,0,-3.6620772925,1.7252682553,-0.6869263704  
H,0,-3.112958745,2.606183784,-1.0184050934  
C,0,-2.9125130484,0.6079189098,-0.226858061  
C,0,-3.5847878937,-0.5900327824,0.2429983144  
C,0,-1.4874902589,0.7606453816,-0.2551723936  
H,0,-1.1575392515,1.7609454103,-0.5823735154  
C,0,0.7333653048,0.279727286,0.0239011231  
C,0,1.3356063813,1.4003996281,0.5241220103  
C,0,1.8044754043,-0.6159671288,-0.4252998161  
C,0,0.7152928299,2.5926381215,1.1611735072  
H,0,1.3776569335,2.9630316841,1.9564509474  
O,0,0.4787695633,3.597924182,0.1838760287  
H,0,-0.2233797476,2.2666809726,1.6302775544  
C,0,3.4303219703,2.4405733773,-0.1509180992  
H,0,4.5071749356,2.2930733495,-0.0560509596  
H,0,3.1638317531,2.5603422617,-1.2078435451  
H,0,3.1498254521,3.3418940733,0.393660756  
C,0,4.271835349,-0.4714883543,-0.1298536718  
C,0,5.1411814082,-0.1191642123,0.9073953052  
H,0,4.8076745853,0.577513461,1.6693653144  
C,0,6.4141010403,-0.6781669281,0.9601561127  
H,0,7.084557627,-0.397299845,1.7671704232  
C,0,6.8226549131,-1.5995426592,-0.0010713815  
H,0,7.8150119198,-2.0373350411,0.0470548917  
C,0,5.9467374638,-1.954479248,-1.0252564497  
H,0,6.2554630804,-2.6705233828,-1.7813931993  
C,0,4.678281581,-1.3897247037,-1.1035089669  
H,0,3.9956987541,-1.6584781524,-1.8998057654  
H,0,0.0595394197,4.3398128792,0.635310926

Sum of electronic and zero-point Energies=,, -1198.404925  
Sum of electronic and thermal Energies=,,, -1198.381605  
Sum of electronic and thermal Enthalpies=,,, -1198.380661  
Sum of electronic and thermal Free Energies=,,, -1198.458960

[L<sup>3</sup>]

O,0,-5.6928082819,-1.6240360733,0.6135030427  
O,0,-3.0643639832,-1.5979880598,0.7176054744  
O,0,1.6283037812,-1.954219997,-0.6910568525  
N,0,-0.5975742972,-0.1745873107,0.0390207621  
N,0,2.7822290298,1.1726247054,0.286479433  
N,0,2.9678028309,-0.1086077107,-0.2418433651  
C,0,-7.0980583281,-1.6472683312,0.565119759  
H,0,-7.4734608035,-1.592669589,-0.4660452928  
H,0,-7.4093453743,-2.5956588751,1.0072368449  
H,0,-7.5415206331,-0.8220556125,1.1391853847  
C,0,-5.0713038818,-0.5165682815,0.1061275434  
C,0,-5.7291497453,0.5598803615,-0.4382589274  
H,0,-6.8141192459,0.5739161439,-0.4884674731  
C,0,-5.004564837,1.670218009,-0.9422690161  
H,0,-5.5397078997,2.5143938316,-1.3665288842  
C,0,-3.6348048119,1.6544461695,-0.8823149011  
H,0,-3.0660037423,2.5013278937,-1.2652751159  
C,0,-2.9103174602,0.5619361218,-0.3320480884  
C,0,-3.6096323714,-0.5922663126,0.2033363457  
C,0,-1.4826817801,0.6962554951,-0.3424831043  
H,0,-1.1349536372,1.6614239004,-0.7420126312  
C,0,0.7269802824,0.2054320725,0.008439724  
C,0,1.3921482575,1.3383543193,0.385074842  
C,0,1.7534654372,-0.7775634254,-0.3663411723  
C,0,0.9010570748,2.6493384484,0.9281304488  
H,0,1.7164087898,3.111235405,1.5058789654  
O,0,0.5726853699,3.4783965758,-0.1628283589  
O,0,-0.1857360677,2.3991737288,1.7699548375  
C,0,3.5034812794,2.1956753279,-0.4816131573  
H,0,4.5715394502,1.9757030114,-0.45013085  
H,0,3.160951548,2.2294885401,-1.5226377411  
H,0,3.3381906031,3.1667878278,-0.0156887473  
C,0,4.2304882896,-0.7210719617,-0.1268593628  
C,0,5.1444851432,-0.2866244094,0.8385530217  
H,0,4.8642799422,0.5123307228,1.516937832  
C,0,6.3929335364,-0.8938524075,0.9291781824  
H,0,7.0980377409,-0.5486223401,1.6797226018  
C,0,6.733290177,-1.9426754909,0.0784257755  
H,0,7.7067653779,-2.4170627914,0.1560854158  
C,0,5.8132235161,-2.377504256,-0.8736919922  
H,0,6.0683508366,-3.1932221896,-1.543988801  
C,0,4.5685847683,-1.7682590126,-0.9905849072  
H,0,3.8521763936,-2.0996343816,-1.7314363016  
H,0,0.5171978473,4.3880712642,0.1552213221  
H,0,-0.3484501213,3.1936089442,2.290787485

Sum of electronic and zero-point Energies=,, -1273.548237  
Sum of electronic and thermal Energies=,,, -1273.523841  
Sum of electronic and thermal Enthalpies=,,, -1273.522897  
Sum of electronic and thermal Free Energies=,,, -1273.603245

[L<sup>3'</sup>]

H,0,0.8006898681,1.542558597,-0.6012683465  
O,0,5.6917562816,0.6830313392,-0.1697963819  
O,0,3.0931101773,1.0765754857,-0.3886967908  
O,0,0.4741188509,2.4045866044,-1.0793539824  
O,0,-1.4516491153,3.3523676306,-1.6780708945  
O,0,-1.7867375504,-1.7527335332,1.1908650666  
N,0,0.5028655841,0.1818450206,0.1486091803  
N,0,-3.0894897933,-0.0394172121,0.3011430535  
N,0,-2.8893284432,1.1328931791,-0.4328212936  
C,0,7.0808429078,0.4801039292,-0.0583321144  
H,0,7.4036053306,0.4413586555,0.9906436077  
H,0,7.5584299332,1.3303924393,-0.5479715322  
H,0,7.3981346389,-0.4460327092,-0.5559151294  
C,0,4.8804505392,-0.2652202366,0.3778121214  
C,0,5.3209900909,-1.3927126052,1.0236714402  
H,0,6.3844364174,-1.585089754,1.1289221474  
C,0,4.3997378128,-2.3297286081,1.5680641834  
H,0,4.7755868348,-3.2134746039,2.0743283616  
C,0,3.0571657024,-2.1036442316,1.4459973808  
H,0,2.3414320307,-2.8126278197,1.8591009815  
C,0,2.5506536102,-0.9478716043,0.7826609776  
C,0,3.454880289,0.0365493296,0.2093529481  
C,0,1.1422295764,-0.8118716544,0.7167323635  
H,0,0.5552615879,-1.6081786864,1.1847622366  
C,0,-0.8614182833,0.2559126732,0.135206834  
C,0,-1.8891829307,-0.6587780676,0.6385609568  
C,0,-1.5115872591,1.3044093653,-0.4645245939  
C,0,-0.8432532023,2.4467429173,-1.1245815558  
C,0,-3.7142792332,2.2595118224,0.0164869694  
H,0,-4.7672518522,2.0156123692,-0.1278615519  
H,0,-3.446634677,3.1124765806,-0.6045377628  
H,0,-3.5290564096,2.4869081543,1.0730309899  
C,0,-4.3485736997,-0.6747009148,0.2633398714  
C,0,-5.1817663294,-0.5206209423,-0.8482178704  
H,0,-4.8471127127,0.0789052412,-1.6885216666  
C,0,-6.4224335906,-1.1489532493,-0.8678444522  
H,0,-7.0687553512,-1.0235045025,-1.7314029507  
C,0,-6.8281196211,-1.9441110657,0.2016919757  
H,0,-7.7948386491,-2.4376548185,0.1793513285  
C,0,-5.9857840723,-2.1017192051,1.3002945054  
H,0,-6.2950263892,-2.7175172938,2.1396055845  
C,0,-4.7507940543,-1.4632588473,1.3443141317  
H,0,-4.095204845,-1.5750191677,2.1989696725

Sum of electronic and zero-point Energies=, , -1272.424426  
Sum of electronic and thermal Energies=, , , -1272.401244  
Sum of electronic and thermal Enthalpies=, , , -1272.400300  
Sum of electronic and thermal Free Energies=, , , -1272.478597

## [L<sup>4</sup>]<sup>2-</sup>

O,0,5.7586214376,-0.3942576784,-1.3291331012  
O,0,3.2776372258,0.474138909,-1.3869291845  
O,0,0.0066054753,3.3281961311,0.2984798283  
O,0,-1.9509236215,3.8344693275,-0.7042445604  
O,0,-1.4663263893,-1.8912260513,0.0867130178  
N,0,0.5967889485,0.3442074395,-0.1803505472  
N,0,-2.9664616619,-0.1160243916,0.0871593499  
N,0,-2.8953999354,1.2657181094,-0.0924187156  
C,0,7.0856374092,-0.856696852,-1.3112464041  
C,0,4.8945148221,-0.9479568595,-0.422086464  
C,0,5.2483369877,-1.9139069447,0.4910186853  
C,0,4.2889673286,-2.4366596979,1.3921839461  
C,0,3.0009049268,-1.9629715591,1.3401561139  
C,0,2.5918936521,-0.9622773087,0.420370406  
C,0,3.5386256533,-0.40211663,-0.5252158881  
C,0,1.2022767865,-0.5851611793,0.4919464109  
C,0,-0.772087362,0.4585712876,-0.0108356609  
C,0,-1.6907124479,-0.6794583984,0.0809497478  
C,0,-1.540200847,1.595546498,-0.0846493198  
C,0,-1.1193598954,3.0587620604,-0.1684361148  
C,0,-3.7795929634,2.0134025163,0.8031031624  
C,0,-4.1512066408,-0.7976136117,-0.2466525675  
C,0,-5.0672387417,-0.236164087,-1.1426618468  
C,0,-6.2401021746,-0.9184950402,-1.4497110488  
C,0,-6.5017337609,-2.1655126344,-0.8868367422  
C,0,-5.5790330311,-2.7250574847,-0.0047914601  
C,0,-4.4114169275,-2.0465304584,0.3275081199  
H,0,7.5745901067,-0.6652095566,-0.3458346055  
H,0,7.6173176045,-0.3103949067,-2.0929532011  
H,0,7.1483628198,-1.9334667336,-1.522025136  
H,0,6.2673103674,-2.2884190937,0.530129101  
H,0,4.579102208,-3.2012899572,2.1066646888  
H,0,2.2525203769,-2.3591981849,2.026504311  
H,0,0.6344036309,-1.1756581105,1.2256247291  
H,0,-4.817451079,1.7407254027,0.6035397794  
H,0,-3.625573892,3.0667606855,0.5739226842  
H,0,-3.5464731826,1.8087761339,1.8559020617  
H,0,-4.8450929857,0.7225640771,-1.5996608189  
H,0,-6.9473659214,-0.4735688383,-2.1437587147  
H,0,-7.4161740076,-2.6966750306,-1.1329158377  
H,0,-5.773158895,-3.6960972653,0.4417452216  
H,0,-3.693731404,-2.4741740331,1.0162265747

Sum of electronic and zero-point Energies=, , -1271.929203  
Sum of electronic and thermal Energies=, , , -1271.905822  
Sum of electronic and thermal Enthalpies=, , , -1271.904878  
Sum of electronic and thermal Free Energies=, , -1271.984505

## [(L<sup>1</sup>)<sub>2</sub>Co<sup>III</sup>]

Co,0,0.4231808125,-0.0063427726,0.0117025045  
O,0,3.3223041168,3.4920476696,-0.5775703255

O,0,1.7474440622,1.4218520006,-0.4489874654  
O,0,-1.2758770286,-1.4608737415,0.2501194875  
O,0,3.1079097553,-3.6295186461,0.8581313947  
O,0,1.638262235,-1.4963124628,0.5922178124  
O,0,-1.1895252388,1.5444002452,-0.3727052805  
N,0,0.4235182232,-0.6785325705,-1.8304431928  
N,0,-1.4004618445,-3.7713030805,-2.3242196265  
N,0,-1.8831211006,-3.2599490635,-1.1200324095  
N,0,0.276094136,0.6605043046,1.8508146323  
N,0,-1.8379745118,3.3528218861,0.9641557783  
N,0,-1.4477607732,3.8288157545,2.2156111944  
C,0,4.1733642371,4.6152124763,-0.6238111112  
H,0,3.7564475945,5.4148896182,-1.2497429609  
H,0,4.2633471426,4.9743947692,0.4023849247  
H,0,5.17015162,4.353950576,-1.0022057361  
C,0,3.057630214,2.8639054659,-1.7535870049  
C,0,3.5580385108,3.2478141779,-2.9791011698  
H,0,4.2155403345,4.1076708676,-3.0545977848  
C,0,3.224598822,2.5353985665,-4.1538862716  
H,0,3.6299680178,2.8568461107,-5.1079225654  
C,0,2.3937112321,1.4491053557,-4.0712227404  
H,0,2.1286840398,0.8903109908,-4.966120062  
C,0,1.8607200365,1.0206450389,-2.8245628554  
C,0,2.1789281323,1.723788298,-1.6171857681  
C,0,1.012552338,-0.1266364856,-2.8525284782  
H,0,0.8458007105,-0.5554650321,-3.8426682797  
C,0,-0.3704917124,-1.8123170364,-1.9454011431  
C,0,-0.5065896324,-2.8452281707,-2.8375634032  
C,0,-1.214032918,-2.0991846115,-0.8153479525  
C,0,0.1452146943,-3.0987650032,-4.1492976685  
H,0,0.2122708833,-4.1698144785,-4.3518742127  
H,0,-0.3999379834,-2.6262957474,-4.9741700573  
H,0,1.1610094849,-2.6964778168,-4.145151609  
C,0,-2.4234393005,-4.3462535356,-3.1972324653  
H,0,-2.9422758776,-5.1438102124,-2.6651644022  
H,0,-3.1442242789,-3.5867769361,-3.5198454965  
H,0,-1.9309659669,-4.7797783828,-4.0667749592  
C,0,-2.512443418,-4.1141147932,-0.1847475762  
C,0,-2.1910912479,-5.4721324979,-0.1359101793  
H,0,-1.4423873614,-5.8732759368,-0.811582872  
C,0,-2.8269857414,-6.2902406082,0.7928717096  
H,0,-2.5809060833,-7.3472574104,0.8277195312  
C,0,-3.7579945584,-5.7574294916,1.681933379  
H,0,-4.2460612804,-6.3988772111,2.4092665087  
C,0,-4.0597199818,-4.397680513,1.633838876  
H,0,-4.7853363804,-3.9755381061,2.3225654318  
C,0,-3.4501378083,-3.5714992991,0.6952221312  
H,0,-3.6884941771,-2.5155604101,0.6419270103  
C,0,3.9052082436,-4.7859693656,0.9796474132  
H,0,4.0899649622,-5.1394713135,-0.0357849648  
H,0,4.865367734,-4.5677986824,1.4649791154  
H,0,3.3936502598,-5.5739535164,1.5475480728  
C,0,2.7460965192,-3.001068758,2.0081562346  
C,0,3.0972628131,-3.4152060994,3.274762597  
H,0,3.7071940375,-4.3025341285,3.4092301058  
C,0,2.670138513,-2.6982072258,4.4163358356  
H,0,2.958040745,-3.0441725088,5.4039068929  
C,0,1.8995826865,-1.5761330078,4.2598458293  
H,0,1.5657851709,-1.0129138936,5.1286087298  
C,0,1.5203192587,-1.1152028744,2.9691944534  
C,0,1.9335807511,-1.8240642214,1.7942535684

C,0,0.7274769097,0.0702816862,2.9210510452  
H,0,0.476297267,0.4974773685,3.8939353004  
C,0,-0.473341445,1.8289067315,1.9032228295  
C,0,-1.1952104992,2.1659605498,0.7034341298  
C,0,-0.6464814982,2.8567701391,2.7942618828  
C,0,-0.1089989729,3.065845328,4.1643792939  
H,0,-0.0133101906,4.1305009616,4.3881474655  
H,0,-0.7487864839,2.6100735676,4.9284922106  
H,0,0.8837284653,2.6171676032,4.2480190172  
C,0,-2.5258484633,4.4291410683,3.0014600956  
H,0,-2.9642321329,5.253338899,2.4385260914  
H,0,-3.3003912434,3.6926525234,3.2427497015  
H,0,-2.100472634,4.8311907342,3.9202300466  
C,0,-2.3441489919,4.2436029189,-0.010347367  
C,0,-3.2123420932,3.7496814872,-0.985455397  
H,0,-3.4909169124,2.7023739877,-0.975425137  
C,0,-3.7009851628,4.6123329053,-1.9612276155  
H,0,-4.3721160697,4.2277888964,-2.7233458821  
C,0,-3.3492531915,5.9608741858,-1.9544666773  
H,0,-3.7435979678,6.6311257946,-2.7120579866  
C,0,-2.4889842527,6.4451183913,-0.9713738987  
H,0,-2.2043232042,7.492954305,-0.9622549689  
C,0,-1.9729597795,5.5898012686,-0.0026109836  
H,0,-1.2785290376,5.9529846461,0.7482993893

Sum of electronic and zero-point Energies=, , -3628.984308  
Sum of electronic and thermal Energies=, , , -3628.937420  
Sum of electronic and thermal Enthalpies=, , , -3628.936476  
Sum of electronic and thermal Free Energies=, , , -3629.070176

### [L<sup>1</sup>Co<sup>III</sup>]<sup>+</sup>

Co,0,-0.5743054401,-1.0783701864,-0.5533925075  
O,0,-4.8756311179,-1.8370246948,-0.7919862797  
O,0,-2.363471896,-1.1742019446,-0.6338344178  
O,0,1.3527761361,-1.1638045196,-0.5523273683  
N,0,-0.4864449891,0.7696426194,-0.355659075  
N,0,2.926827582,1.8609152301,0.0386355035  
N,0,2.992517005,0.5094736965,-0.2574967986  
C,0,-6.2321297443,-2.2271762188,-0.8862118269  
H,0,-6.7141121905,-1.7931907404,-1.7704580062  
H,0,-6.2282534582,-3.3136644674,-0.9753167502  
H,0,-6.7958832614,-1.9395814049,0.0093291304  
C,0,-4.6150981199,-0.5158641062,-0.6715285723  
C,0,-5.5695740418,0.4869657962,-0.6327110492  
H,0,-6.6221976677,0.2359739747,-0.7011143944  
C,0,-5.1957564874,1.8379009111,-0.5064701572  
H,0,-5.9655476795,2.601824096,-0.4789324232  
C,0,-3.8688099838,2.1797080848,-0.4192455982  
H,0,-3.5670016673,3.2183089809,-0.3200640488  
C,0,-2.8685609429,1.1759570743,-0.4545349696  
C,0,-3.2297289306,-0.190205554,-0.5841689609  
C,0,-1.5050002159,1.5814863334,-0.357274982  
H,0,-1.3142920651,2.6509901641,-0.2866002983  
C,0,0.8562023652,1.1408303026,-0.2628536782  
C,0,1.6230190288,2.2617606888,0.0037742061  
C,0,1.732897158,0.0468914574,-0.3962805775  
C,0,1.2331913126,3.6768255691,0.2272857979  
H,0,1.9767028233,4.2100934719,0.8207982559



H,0,1.1055789203,4.2039416225,-0.7241639048  
H,0,0.2873591687,3.7222294735,0.7705872345  
C,0,4.0727180643,2.6931874012,-0.2965785256  
H,0,4.9730617483,2.265629209,0.1426086057  
H,0,4.187861105,2.7757355751,-1.3811680762  
H,0,3.9154360342,3.6800961937,0.1333034603  
C,0,4.1737813798,-0.2614482123,-0.0663317573  
C,0,4.8502997712,-0.2033067783,1.1518137188  
H,0,4.4805091372,0.4332835761,1.9498371631  
C,0,5.9927262056,-0.9776919493,1.3229596584  
H,0,6.5315148127,-0.9356736378,2.2641829387  
C,0,6.4322706282,-1.8153859925,0.2988578445  
H,0,7.3196953519,-2.4241061112,0.4417058364  
C,0,5.7357525078,-1.8745106855,-0.906214757  
H,0,6.0780445446,-2.5259032151,-1.7039598278  
C,0,4.6050377765,-1.0867008981,-1.1013005925  
H,0,4.0620193317,-1.1066401853,-2.0402991733

Sum of electronic and zero-point Energies=, , -2505.623252  
Sum of electronic and thermal Energies=, , , -2505.600107  
Sum of electronic and thermal Enthalpies=, , , -2505.599163  
Sum of electronic and thermal Free Energies=, , , -2505.677592

### [L<sup>1</sup>Co( $\eta^2$ -O<sub>2</sub>)]<sup>+</sup>

Co,0,-0.9517187549,-1.1059026972,0.652391622  
O,0,-5.1496096958,-1.642180373,-0.2538112231  
O,0,-2.5968370152,-1.1835408647,0.0157647897  
O,0,1.6588079727,-1.336303764,-0.8817862555  
N,0,-0.5014087182,0.5186560529,-0.1472628776  
N,0,2.8520358307,1.7186786226,0.1988631083  
N,0,3.0502613605,0.476386814,-0.389070377  
C,0,-6.5315232282,-1.9251136827,-0.4009075316  
H,0,-6.859233266,-1.7777889151,-1.4361055542  
H,0,-6.6524171892,-2.9730335618,-0.1282206702  
H,0,-7.1379042815,-1.3030113781,0.2669626735  
C,0,-4.7350314673,-0.3959934748,-0.5424843046  
C,0,-5.5428381617,0.6484303557,-0.9662056996  
H,0,-6.6093497058,0.4934197087,-1.0828824447  
C,0,-5.0021173919,1.9147335978,-1.2498580478  
H,0,-5.6623168327,2.7079639181,-1.5834998181  
C,0,-3.6531604169,2.1449696938,-1.1147134304  
H,0,-3.2277137633,3.1171267098,-1.3421215433  
C,0,-2.8041015795,1.1062453223,-0.66734954  
C,0,-3.3392080935,-0.1737646151,-0.3715319409  
C,0,-1.4028919717,1.3424028335,-0.6128792934  
H,0,-1.041531669,2.2789607402,-1.0361670463  
C,0,0.8535589502,0.8189155213,-0.1267709156  
C,0,1.5227639018,1.9465408809,0.3134148878  
C,0,1.8259929979,-0.1685940537,-0.5342181012  
C,0,0.9859446382,3.2313313204,0.8258772983  
H,0,1.567633366,3.5830129139,1.6810898696  
H,0,1.00616892,4.0088823563,0.0547848829  
H,0,-0.0482040809,3.1003337871,1.1494482316  
C,0,3.8448007628,2.7563520976,-0.0340887686  
H,0,4.8312895888,2.3848644871,0.2409440399  
H,0,3.8440476827,3.0631616888,-1.0845915684  
H,0,3.6053889327,3.6077990893,0.6008945869

C,0,4.2891689993,-0.2022162586,-0.2485472325  
C,0,4.9989204522,-0.1492329728,0.95217314  
H,0,4.6053989843,0.4176075113,1.790727117  
C,0,6.2032671801,-0.8376714139,1.0599043717  
H,0,6.7628746447,-0.792631992,1.9891067841  
C,0,6.678612337,-1.594713455,-0.0093509301  
H,0,7.6146492985,-2.136896247,0.0829312428  
C,0,5.951152882,-1.6556022323,-1.1962733312  
H,0,6.3180836184,-2.2438399732,-2.0317230429  
C,0,4.7589118878,-0.9500604645,-1.3267136043  
H,0,4.1914392717,-0.9743084042,-2.2504762174  
O,0,-0.5836906086,-0.6986580471,2.3962670949  
O,0,0.5220334306,-1.1147171825,1.9007655697

Sum of electronic and zero-point Energies=,, -2655.751665  
Sum of electronic and thermal Energies=,,, -2655.725612  
Sum of electronic and thermal Enthalpies=,,, -2655.724668  
Sum of electronic and thermal Free Energies=,,, -2655.809690

### **[{L<sup>1</sup>Co( $\eta^2$ -O<sub>2</sub>)}]<sup>+</sup>]**

Co,0,-1.5784629955,0.0900423655,1.8069338348  
O,0,-5.1232896241,-1.4060818393,-0.2185101823  
O,0,-2.7643374786,-0.6960918498,0.662469445  
O,0,1.3498394443,0.4696204295,-1.8187164676  
N,0,-0.5659959751,0.8692807722,0.435064655  
N,0,2.9361891707,0.6155559504,1.2536149619  
N,0,2.9486143549,0.5185239217,-0.1330799517  
C,0,-6.3988009383,-1.8078834375,-0.6785846051  
H,0,-6.3486190576,-2.2160993877,-1.695225838  
H,0,-6.7359043,-2.5865341791,0.0059240807  
H,0,-7.1129244403,-0.9757104388,-0.659915898  
C,0,-4.4889841866,-0.436721562,-0.9150667379  
C,0,-4.9868911222,0.1970259901,-2.0392341234  
H,0,-5.9645307816,-0.0703068422,-2.4248233664  
C,0,-4.2414318291,1.1942458388,-2.7004937035  
H,0,-4.6577066234,1.6688363719,-3.5829408088  
C,0,-2.9989482625,1.5485533174,-2.2372956425  
H,0,-2.4066635896,2.3014628297,-2.7491629464  
C,0,-2.4701210884,0.933076249,-1.0753467498  
C,0,-3.2093203316,-0.0703584352,-0.3921651927  
C,0,-1.1330500983,1.2343337708,-0.6917082209  
H,0,-0.5214357772,1.7739816306,-1.4104794596  
C,0,0.8288443283,0.9138825393,0.5207541507  
C,0,1.6431941736,0.9204334977,1.6306433226  
C,0,1.6644289983,0.6350984965,-0.6431727116  
C,0,1.3462661276,1.1980809595,3.0323424962  
H,0,0.3048979062,0.4026267782,3.4594949741  
H,0,2.0655828677,0.7814567672,3.7414078629  
H,0,1.0903668194,2.2277315224,3.2595062712  
C,0,4.0625079474,1.359530532,1.8207959219  
H,0,4.9928251275,0.8945204658,1.4953811145  
H,0,4.0418182397,2.4082068871,1.5060405182  
H,0,4.012295031,1.2973471502,2.9067361057  
C,0,4.0170594453,-0.1360206899,-0.7888357512  
C,0,4.71545545,-1.1639744834,-0.151240712  
H,0,4.4280128616,-1.4711909396,0.8494747753  
C,0,5.7645973221,-1.7908009882,-0.8163781432  
H,0,6.3109955162,-2.5863994356,-0.3189222218

C,0,6.1012869097,-1.414475931,-2.1149562896  
H,0,6.9159804394,-1.9116836752,-2.6323882237  
C,0,5.3879933373,-0.3974659676,-2.7469266299  
H,0,5.6462073065,-0.0978192521,-3.7581689473  
C,0,4.3520749265,0.2548719018,-2.0864871907  
H,0,3.799616971,1.0544183982,-2.5654923171  
O,0,-2.5567758601,0.7169935286,2.9883133071  
O,0,-0.6977931725,0.8485570622,3.2961883249

Sum of electronic and zero-point Energies=, , -2655.667286  
Sum of electronic and thermal Energies=, , , -2655.642341  
Sum of electronic and thermal Enthalpies=, , , -2655.641398  
Sum of electronic and thermal Free Energies=, , , -2655.722510

### [L<sup>2</sup>Co(OH)]

Co,0,0.820155908,1.1265931672,-0.5933828821  
O,0,4.5643668196,-0.986253759,-1.5073339926  
O,0,2.2358580818,-0.0424211542,-0.7820212294  
O,0,-0.9852298515,-1.6089699037,0.4427274968  
N,0,0.6657525492,0.7420755404,1.1484245615  
N,0,-2.8885096191,1.3445549405,0.5019929012  
N,0,-2.7182963019,-0.0617233215,0.3564562245  
C,0,5.8052920658,-1.5172748594,-1.9278464001  
H,0,5.8617043569,-2.5976540105,-1.7474865509  
H,0,5.868664518,-1.3274274102,-2.9995707258  
H,0,6.6451331283,-1.0245750356,-1.4228542608  
C,0,4.2528064035,-1.0992768126,-0.1959121962  
C,0,5.0455292696,-1.6935639389,0.7665624202  
H,0,6.0062254754,-2.1152885837,0.4919486918  
C,0,4.6229286398,-1.7789371364,2.1118710082  
H,0,5.266646035,-2.2641643418,2.8381510831  
C,0,3.4125742099,-1.2569391431,2.4881181757  
H,0,3.0707685661,-1.3185375685,3.51729984  
C,0,2.5936659302,-0.6058920225,1.5306006795  
C,0,2.9853573337,-0.5341804277,0.1608050007  
C,0,1.3055455307,-0.1270864476,1.8817349274  
H,0,0.8234103557,-0.4800895945,2.7938279159  
C,0,-0.6465652559,0.7795951806,0.7561619668  
C,0,-1.625290375,1.8299556642,0.9647598844  
C,0,-1.4173830243,-0.4686118555,0.5326540557  
C,0,-1.4456705781,3.0377867578,1.533479603  
H,0,-2.2700324748,3.7242863836,1.6956129388  
O,0,-0.2160645232,3.4391183379,1.9170451707  
C,0,-4.0117032997,1.6393579127,1.392579712  
H,0,-4.9019977598,1.1270325726,1.025441183  
H,0,-3.8077046602,1.3373937983,2.4281259955  
H,0,-4.2113485614,2.7113868754,1.3540944556  
C,0,-3.6792276217,-0.7739302876,-0.3960745397  
C,0,-4.4831268949,-0.1031461066,-1.323128528  
H,0,-4.3597004532,0.965435023,-1.4618194931  
C,0,-5.4197327139,-0.8177965391,-2.0626383011  
H,0,-6.0409726549,-0.2920908824,-2.7818672385  
C,0,-5.5560312442,-2.1939440853,-1.8927381835  
H,0,-6.2874663995,-2.7471582327,-2.4738924414  
C,0,-4.7495929967,-2.8537264999,-0.9677096165  
H,0,-4.8509709225,-3.9253681491,-0.823268313  
C,0,-3.8179867555,-2.1525037865,-0.2086493181  
H,0,-3.1941815472,-2.6609335971,0.5156082261

O,0,0.083342347,2.5335062271,-1.3626223624  
H,0,-0.2842916031,4.3010126489,2.3401540484  
H,0,-0.879039612,2.5078150933,-1.4106130433

Sum of electronic and zero-point Energies=,, -2655.966626  
Sum of electronic and thermal Energies=,,, -2655.940868  
Sum of electronic and thermal Enthalpies=,,, -2655.939924  
Sum of electronic and thermal Free Energies=,, -2656.022986

### [L<sup>2</sup>Co(OH<sub>2</sub>)]

Co,-0.15882504,1.74620336,-1.89935919  
O,-0.54352715,0.18603496,-3.11173522  
O,-0.04920616,3.39221529,-0.78995735  
O,0.09152831,-1.68053768,1.97325693  
O,1.90871538,1.57328544,-2.27219266  
N,0.15815884,0.55222682,-0.19009881  
N,-0.10070408,-2.85464124,-1.27373576  
O,-0.54968791,5.73445370,0.23258617  
N,-0.01570362,-3.02578253,0.10196790  
C,0.11786059,-0.83890395,-0.32614740  
C,0.02109989,-1.51988627,-1.51659163  
C,0.08798528,-1.04711295,-2.93154843  
C,0.08711541,-1.81780152,0.73291175  
C,0.09377940,3.49808522,0.50989444  
C,0.42419487,2.42157917,1.36905469  
C,0.45928377,1.04966210,0.97783437  
C,0.63710585,2.68929251,2.75088300  
C,0.46418486,3.93038340,3.26616712  
C,0.78695159,-4.68631671,1.65521155  
C,-0.15965078,-4.30421471,0.72343099  
C,-0.13728302,4.77301749,1.10182930  
C,0.13551131,-3.95777717,-2.17927781  
C,0.05095399,4.97328306,2.45293312  
C,0.67158303,-5.92809373,2.27181023  
C,-1.20356271,-5.14050097,0.39743991  
C,-0.35882659,-6.77901663,1.91320846  
C,-1.29196828,-6.38641126,0.99657680  
C,-1.53442310,6.63085050,0.74430716  
H,1.04454217,-0.97693351,-3.21529798  
H,2.32313873,1.36856243,-1.53181791  
H,2.21387179,2.33257456,-2.57298761  
H,-0.39277517,-1.71921266,-3.49510886  
H,0.73394003,0.42922326,1.64122534  
H,0.90452792,1.98331207,3.32376262  
H,0.62900989,4.08707515,4.18838261  
H,1.50870316,-4.10965851,1.87191870  
H,0.77761166,-4.57957107,-1.77668561  
H,0.49777769,-3.61407827,-3.02431280  
H,-0.70724393,-4.42730900,-2.35145349  
H,-0.10363689,5.83363372,2.82796433  
H,1.29641679,-6.19002620,2.93657722  
H,-1.85839746,-4.86576373,-0.23238459  
H,-0.41630495,-7.64131671,2.30906300  
H,-2.00546631,-6.97149476,0.76774969  
H,-1.90931863,7.15843248,0.00847525  
H,-1.12024764,7.22942137,1.39952972  
H,-2.24825760,6.11860453,1.17542821

Sum of electronic and zero-point Energies=, , -2656.373695  
Sum of electronic and thermal Energies=, , , -2656.354348  
Sum of electronic and thermal Enthalpies=, , , -2656.353404  
Sum of electronic and thermal Free Energies=, , , -2656.420919

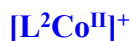

Co, 0, 0.7134933986, -1.242375453, -0.0724713653  
O, 0, 5.0275965203, -1.9402031425, -0.2654898827  
O, 0, 2.5046533809, -1.3127974163, -0.1416568104  
O, 0, -1.2072557192, -1.3626674707, 0.0453253259  
N, 0, 0.5933054178, 0.6128484585, -0.0447088139  
N, 0, -2.8540161781, 1.6783704626, -0.0934456787  
N, 0, -2.8809247903, 0.3014285363, 0.0354878024  
C, 0, 6.391003682, -2.3117787715, -0.327083528  
H, 0, 6.9419874985, -1.9649761338, 0.5553702663  
H, 0, 6.4060527632, -3.4014864193, -0.355195665  
H, 0, 6.8738544504, -1.919886465, -1.2303551125  
C, 0, 4.7440990037, -0.6187254605, -0.2203919435  
C, 0, 5.6816385707, 0.4006289482, -0.2305246812  
H, 0, 6.7387487122, 0.1639336417, -0.2779586984  
C, 0, 5.2847692269, 1.7499455944, -0.1784820153  
H, 0, 6.0417517647, 2.5270439213, -0.1876806165  
C, 0, 3.9516154847, 2.0730793692, -0.1168359408  
H, 0, 3.6311011496, 3.1099795515, -0.0771074741  
C, 0, 2.9677341706, 1.0526446269, -0.1064157639  
C, 0, 3.3530655917, -0.3122922549, -0.1561601904  
C, 0, 1.5979412761, 1.4434816506, -0.0438597981  
H, 0, 1.3701406324, 2.5066105575, 0.0377613861  
C, 0, -0.7555813542, 0.9700227757, 0.0051820517  
C, 0, -1.5576569725, 2.0948220018, -0.0793998046  
C, 0, -1.6098817228, -0.1488846427, 0.0557714899  
C, 0, -1.1760085335, 3.5355683332, -0.1887538494  
H, 0, -2.0559296317, 4.1775246259, -0.0774383867  
O, 0, -0.2079046945, 3.8034541901, 0.8008586855  
H, 0, -0.7802963308, 3.6995103796, -1.2023586395  
C, 0, -4.0184788522, 2.4358762762, 0.342536539  
H, 0, -4.9170443285, 1.9402453934, -0.0218412842  
H, 0, -4.0504101599, 2.5103648724, 1.4329770441  
H, 0, -3.9784459206, 3.4271279475, -0.1034642788  
C, 0, -4.0623326123, -0.4741776958, -0.1450725375  
C, 0, -4.7720742029, -0.3874983384, -1.3422539963  
H, 0, -4.4313628571, 0.2770078254, -2.1303394265  
C, 0, -5.9117628663, -1.1681297555, -1.5036727014  
H, 0, -6.4771122028, -1.1058809174, -2.4279633762  
C, 0, -6.3156196784, -2.0370399709, -0.4907700125  
H, 0, -7.2013990193, -2.6498270396, -0.6262748351  
C, 0, -5.5869365637, -2.1228188433, 0.6935383965  
H, 0, -5.9022759826, -2.7987160439, 1.4818723609  
C, 0, -4.4573834771, -1.3310044794, 0.8784253381  
H, 0, -3.8872249375, -1.370925513, 1.8006659683  
H, 0, 0.1254859537, 4.6953229374, 0.6496350425

Sum of electronic and zero-point Energies=, , -2580.749999  
Sum of electronic and thermal Energies=, , , -2580.725846  
Sum of electronic and thermal Enthalpies=, , , -2580.724902  
Sum of electronic and thermal Free Energies=, , , -2580.806149

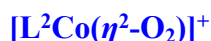

Co, 0, -1.1070023508, -1.450972169, 0.4048480663  
 O, 0, -5.3629645711, -1.651710442, -0.3268894982  
 O, 0, -2.7822238762, -1.3378401102, -0.127468092  
 O, 0, 1.5788876977, -1.4353516873, -1.1882623762  
 N, 0, -0.6189058706, 0.2814101686, -0.1083245203  
 N, 0, 2.7319952221, 1.5027226224, 0.2306001269  
 N, 0, 2.9336390824, 0.333391938, -0.4844762994  
 C, 0, -6.7628612214, -1.8563434612, -0.4313018411  
 H, 0, -7.140469644, -1.5298116619, -1.4065999463  
 H, 0, -6.9159300281, -2.9297216941, -0.3241831312  
 H, 0, -7.3011931633, -1.3304628032, 0.3650871387  
 C, 0, -4.9074603506, -0.3913243466, -0.4234968386  
 C, 0, -5.6851461898, 0.7399603111, -0.6224476384  
 H, 0, -6.761598482, 0.6475106594, -0.7108217798  
 C, 0, -5.0995779128, 2.0144884933, -0.7123146914  
 H, 0, -5.7368955717, 2.8771347197, -0.8737438172  
 C, 0, -3.736503529, 2.1693041451, -0.604968527  
 H, 0, -3.2779287801, 3.1497825238, -0.6830720288  
 C, 0, -2.9163305482, 1.0389980713, -0.3867582622  
 C, 0, -3.4968880748, -0.2516232174, -0.2918565661  
 C, 0, -1.5058236065, 1.2130698223, -0.358883835  
 H, 0, -1.1170290466, 2.20673996, -0.5949137  
 C, 0, 0.7409340254, 0.5685834348, -0.0988109801  
 C, 0, 1.4009300583, 1.6576303739, 0.4272824524  
 C, 0, 1.7204760466, -0.3276169702, -0.6777973116  
 C, 0, 0.8157454405, 2.8754239306, 1.0610016745  
 H, 0, 1.5399692788, 3.3285147087, 1.7478858198  
 O, 0, 0.4387635095, 3.755465887, 0.0195626029  
 H, 0, -0.0470248255, 2.5572498127, 1.6628153755  
 C, 0, 3.647805448, 2.6099273123, -0.0220608414  
 H, 0, 4.6697666817, 2.2849436708, 0.1685617304  
 H, 0, 3.5518665299, 2.9551053127, -1.0554728921  
 H, 0, 3.4074410053, 3.4214277814, 0.6620739196  
 C, 0, 4.1998116521, -0.3061039571, -0.4711901304  
 C, 0, 4.9902476407, -0.2827396009, 0.6794134868  
 H, 0, 4.6348674455, 0.2243088279, 1.5714800979  
 C, 0, 6.2242122047, -0.9249987229, 0.6694554496  
 H, 0, 6.8449258787, -0.9017378165, 1.5598692649  
 C, 0, 6.6519319039, -1.6085672574, -0.467086204  
 H, 0, 7.6118685809, -2.1156159362, -0.4669310579  
 C, 0, 5.8451291901, -1.6409814587, -1.6027536432  
 H, 0, 6.1743626111, -2.1722829155, -2.4904202191  
 C, 0, 4.6205062896, -0.9802334767, -1.6165385723  
 H, 0, 3.9910197023, -0.9853713196, -2.4990015903  
 O, 0, -0.5487583074, -1.5434288958, 2.1545638057  
 O, 0, 0.4631702091, -1.8400843429, 1.4275690855  
 H, 0, 0.0294042157, 4.5304852454, 0.4222737544

Sum of electronic and zero-point Energies=, , -2730.878424  
 Sum of electronic and thermal Energies=, , , -2730.851439  
 Sum of electronic and thermal Enthalpies=, , , -2730.850494  
 Sum of electronic and thermal Free Energies=, , -2730.937573

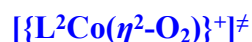

Co, 0, -1.6819951273, 1.7211040594, -0.0557714466  
 O, 0, -5.7510512161, 0.0223492506, -0.0560689328  
 O, 0, -3.2776592004, 0.8352060181, 0.0073142716  
 O, 0, 1.6978009923, -1.9408207442, -0.1764412

N,0,-0.5484064331,0.2066859536,0.0346821968  
N,0,2.8894106897,1.3027837698,-0.2101758439  
N,0,3.0456560479,-0.0675280182,-0.3566618289  
C,0,-7.1007311935,-0.395541088,-0.079371713  
H,0,-7.3589488071,-0.9730934289,0.8168245188  
H,0,-7.7000341224,0.5150090236,-0.1051181008  
H,0,-7.3204856299,-0.9981326007,-0.9692721771  
C,0,-4.802678165,-0.9436003837,-0.0231346692  
C,0,-5.0494960669,-2.3026578869,-0.006275305  
H,0,-6.0697558853,-2.6699650065,-0.0231826648  
C,0,-3.9875820197,-3.2313354123,0.0287702292  
H,0,-4.2110635935,-4.2931226156,0.0389622738  
C,0,-2.6900125284,-2.7892812322,0.0472468187  
H,0,-1.8631232071,-3.4936139781,0.0705316873  
C,0,-2.4005592614,-1.3980806787,0.0354267966  
C,0,-3.4569909258,-0.4513796666,0.0020700808  
C,0,-1.0309705528,-1.0169170154,0.0374061953  
H,0,-0.3021824197,-1.8272288469,0.0235182132  
C,0,0.8440618468,0.3609340605,-0.0788939622  
C,0,1.5468252714,1.5395167658,-0.1131493003  
C,0,1.8229542117,-0.7161367126,-0.2115742982  
C,0,1.0211882964,2.9365977337,-0.0828452281  
H,0,0.8178997306,3.3010194,-1.0969871616  
O,0,-0.2010513925,2.9131829836,0.6261187277  
H,0,1.73144133,3.6106543201,0.4010421893  
C,0,3.7398309699,2.1379770182,-1.0566358671  
H,0,4.7820763909,1.868312621,-0.8883325711  
H,0,3.4906368577,2.0133781978,-2.115531768  
H,0,3.6081414761,3.1795120012,-0.7636702891  
C,0,4.3029060139,-0.6658296019,-0.101761031  
C,0,5.1740607921,-0.1109822533,0.8383658818  
H,0,4.8799928984,0.7776290424,1.3883733371  
C,0,6.4069869039,-0.7146084922,1.0661129203  
H,0,7.0872533384,-0.2798159516,1.792182335  
C,0,6.759991818,-1.875871419,0.3819514189  
H,0,7.7201103497,-2.3472258992,0.5682915277  
C,0,5.8765901775,-2.4295446765,-0.5429084901  
H,0,6.1465693549,-3.3330117749,-1.0813470045  
C,0,4.6509428765,-1.8233422382,-0.799244869  
H,0,3.9630787131,-2.2380010395,-1.5265527502  
O,0,-1.885415613,2.6525532552,-1.3785012486  
H,0,-0.2158130368,3.4881315373,1.3962527714

Sum of electronic and zero-point Energies= -2655.780743

Sum of electronic and thermal Energies= -2655.755706

Sum of electronic and thermal Enthalpies= -2655.754761

Sum of electronic and thermal Free Energies= -2655.837273

### [L<sup>3</sup>Co(OH)]

Co,0,-1.6533132789,1.5587003479,0.2220278545  
O,0,-5.7462441136,-0.0791761279,0.5722173055  
O,0,-3.2362659583,0.6734213147,0.5115332296  
O,0,1.6493140362,-2.0422174585,-0.2889469729  
N,0,-0.5851185176,0.0686148499,0.0740981922  
N,0,2.830006316,1.1929582172,0.0059512456  
N,0,3.0031000814,-0.1594143976,-0.2450376978  
C,0,-7.1042937893,-0.4699069921,0.6133293387  
H,0,-7.2808774115,-1.2288690128,1.3851973325

H,0,-7.6712835031,0.4290780607,0.8562823323  
H,0,-7.4400205599,-0.8584705884,-0.3558651534  
C,0,-4.8342598973,-1.0356864401,0.2819435254  
C,0,-5.1186012245,-2.3644567524,0.02798219  
H,0,-6.1453566431,-2.7131789796,0.0479185219  
C,0,-4.0893297388,-3.2847625723,-0.2615868555  
H,0,-4.3445927373,-4.3213543093,-0.4552669598  
C,0,-2.7822149292,-2.8692228214,-0.2939508883  
H,0,-1.9806325829,-3.5689271677,-0.5120550952  
C,0,-2.457955373,-1.5098388242,-0.0458268355  
C,0,-3.4817644645,-0.5726735743,0.2475488778  
C,0,-1.0877069163,-1.135944468,-0.0675999945  
H,0,-0.3566692127,-1.9325218941,-0.2147049081  
C,0,0.7992879634,0.2433114903,-0.0211617497  
C,0,1.4905095203,1.4238999555,0.0752299842  
C,0,1.7784428232,-0.8191581072,-0.2112125503  
C,0,0.9339740396,2.8230261358,0.1632725069  
H,0,1.0859904748,3.3152525516,-0.8194898778  
O,0,-0.3852784541,2.8155039541,0.5085579733  
O,0,1.7034924149,3.4982920772,1.1329705909  
C,0,3.7467792564,2.111044764,-0.6628120935  
H,0,4.7721369298,1.8295527694,-0.4238198813  
H,0,3.602867288,2.0897023699,-1.748225634  
H,0,3.5520684073,3.1065753222,-0.2675933556  
C,0,4.2462077667,-0.781300077,0.02873838  
C,0,5.0438518887,-0.3337312449,1.083965747  
H,0,4.705686913,0.4907219525,1.7041995032  
C,0,6.260324883,-0.9615771165,1.3330686087  
H,0,6.8843951574,-0.6104117585,2.1492620375  
C,0,6.667262587,-2.0429254748,0.5540886794  
H,0,7.6137396211,-2.5345146967,0.7572542893  
C,0,5.8557574019,-2.4911976683,-0.4863595456  
H,0,6.1681703335,-3.3322486163,-1.097937442  
C,0,4.6484215631,-1.8572438701,-0.7627544809  
H,0,4.016102669,-2.1889692918,-1.5779666193  
O,0,-1.9985569828,1.9204527013,-1.4663134674  
H,0,-1.2669424743,2.4759850742,-1.7663289537  
H,0,1.4252037773,4.4216230146,1.1097495459

Sum of electronic and zero-point Energies=,, -2731.172636  
Sum of electronic and thermal Energies=,,, -2731.146595  
Sum of electronic and thermal Enthalpies=,,, -2731.145651  
Sum of electronic and thermal Free Energies=,,, -2731.229263

### [L<sup>3</sup>Co(OH<sub>2</sub>)]

Co,-0.22330000,0.66990000,-2.85600000  
O,-1.05830000,-1.17610000,-2.97600000  
O,0.22370000,2.59890000,-2.83300000  
O,0.13870000,-0.15510000,2.24600000  
O,1.71070000,-0.08510000,-3.20800000  
N,0.14870000,0.53090000,-0.78700000  
N,-0.72930000,-2.80210000,0.19700000  
O,0.20870000,5.17190000,-3.23500000  
N,-0.44630000,-2.23310000,1.43200000  
C,-0.09630000,-0.68110000,-0.13400000  
C,-0.47330000,-1.85310000,-0.74600000  
C,-0.57430000,-2.22410000,-2.18900000  
C,-0.08430000,-0.92310000,1.28800000



C,0.58770000,3.34490000,-1.81700000  
 C,0.90770000,2.84490000,-0.53100000  
 C,0.69770000,1.49890000,-0.10600000  
 C,1.37470000,3.75390000,0.46000000  
 C,1.45270000,5.08490000,0.21900000  
 C,0.37070000,-2.94210000,3.58700000  
 C,-0.65530000,-2.93110000,2.66100000  
 C,0.62570000,4.75590000,-2.00900000  
 C,-0.79030000,-4.23810000,0.03300000  
 C,1.05470000,5.59790000,-1.00500000  
 C,0.19370000,-3.61810000,4.79000000  
 C,-1.83930000,-3.58610000,2.91500000  
 C,-0.98430000,-4.30510000,5.02400000  
 C,-1.99330000,-4.28010000,4.10400000  
 C,-0.55330000,6.37790000,-3.23800000  
 O,0.63170000,-2.68810000,-2.57100000  
 H,2.20870000,0.05490000,-2.50500000  
 H,2.06070000,0.32190000,-3.89500000  
 H,-1.22430000,-2.98110000,-2.25900000  
 H,0.99170000,1.28290000,0.77000000  
 H,1.63570000,3.42090000,1.30800000  
 H,1.78370000,5.66890000,0.89100000  
 H,1.18770000,-2.49510000,3.40500000  
 H,-0.17930000,-4.66610000,0.66900000  
 H,-0.52730000,-4.47310000,-0.88300000  
 H,-1.70430000,-4.54910000,0.20100000  
 H,1.07770000,6.53690000,-1.15500000  
 H,0.87770000,-3.60710000,5.44800000  
 H,-2.54530000,-3.56210000,2.28100000  
 H,-1.09030000,-4.79610000,5.83100000  
 H,-2.80530000,-4.74210000,4.28000000  
 H,-0.96930000,6.49890000,-4.11700000  
 H,0.03670000,7.13590000,-3.04700000  
 H,-1.24930000,6.32490000,-2.55200000  
 H,0.60870000,-2.88510000,-3.38600000

|                                              |              |
|----------------------------------------------|--------------|
| Sum of electronic and zero-point Energies=   | -2731.506508 |
| Sum of electronic and thermal Energies=      | -2731.486227 |
| Sum of electronic and thermal Enthalpies=    | -2731.485283 |
| Sum of electronic and thermal Free Energies= | -2731.554837 |

### [L<sup>3</sup>Co]<sup>+</sup>

Co,0,0.6122969634,-1.2588625348,-0.0548065147  
 O,0,4.9188693263,-2.0331653723,-0.1421864236  
 O,0,2.4013254365,-1.3666331407,-0.0983610711  
 O,0,-1.3025362861,-1.352753063,0.0559055774  
 N,0,0.5114688916,0.5998798437,-0.075919755  
 N,0,-2.9447588365,1.6842457101,-0.0756869976  
 N,0,-2.9662957941,0.3118394451,0.0744544618  
 C,0,6.2782143128,-2.4238881437,-0.1617260249  
 H,0,6.8109264746,-2.0687232215,0.7285925961  
 H,0,6.2790755565,-3.5140027071,-0.1704571805  
 H,0,6.7894528771,-2.0544263058,-1.0587888526  
 C,0,4.6530962006,-0.7073082229,-0.1281485976  
 C,0,5.6048989202,0.2987024952,-0.1316926694  
 H,0,6.6594058881,0.0465677656,-0.1467416026  
 C,0,5.2264116249,1.6543328394,-0.1150032463  
 H,0,5.9945705084,2.4204314597,-0.1179575016

C,0,3.8970566964,1.9968784339,-0.0953255597  
H,0,3.5901949348,3.0386124406,-0.0831031379  
C,0,2.8981239989,0.9904645469,-0.0916884625  
C,0,3.2654605736,-0.3801798021,-0.1062198379  
C,0,1.5351658194,1.4079586206,-0.0731203073  
H,0,1.3294383005,2.4771594842,-0.069987446  
C,0,-0.8352447753,0.9797628843,-0.0380605503  
C,0,-1.6462236582,2.0983704686,-0.1106893876  
C,0,-1.6965372907,-0.1376394406,0.0546051424  
C,0,-1.3557320232,3.5748987101,-0.1578396075  
H,0,-2.1476572449,4.0778297354,-0.7289376581  
O,0,-1.3452380182,4.0161485422,1.1667786343  
O,0,-0.1364766894,3.7310591008,-0.8145037194  
C,0,-4.0516278949,2.4585506821,0.4724050224  
H,0,-4.9864787742,1.9596763992,0.222497582  
H,0,-3.9544992892,2.561759609,1.556072513  
H,0,-4.0545461598,3.4411724554,0.0041011565  
C,0,-4.1526295483,-0.4633440461,-0.0631582593  
C,0,-4.9574093409,-0.3050952925,-1.1908596758  
H,0,-4.6853692122,0.4137021924,-1.9575961719  
C,0,-6.1006727032,-1.0876625909,-1.3130805663  
H,0,-6.7389153047,-0.9702375301,-2.1829404191  
C,0,-6.4148534222,-2.0286270305,-0.3335307638  
H,0,-7.3037174456,-2.6427379593,-0.4393305276  
C,0,-5.5917899168,-2.1843325798,0.7797459363  
H,0,-5.8369179707,-2.9159273107,1.5429169644  
C,0,-4.457343111,-1.3921543107,0.9281433571  
H,0,-3.8151622062,-1.4877866129,1.7972207479  
H,0,-1.5304555675,4.9628171633,1.1819003233  
H,0,-0.0225025206,4.6588619759,-1.0512224992

Sum of electronic and zero-point Energies=,, -2655.896633  
Sum of electronic and thermal Energies=,,, -2655.871440  
Sum of electronic and thermal Enthalpies=,,, -2655.870496  
Sum of electronic and thermal Free Energies=,, -2655.953713

### [L<sup>3</sup>Co( $\eta^2$ -O<sub>2</sub>)]<sup>+</sup>

Co,0,-1.1418419211,-1.2501729316,0.6926781307  
O,0,-5.3629048098,-1.6295245292,-0.1505235945  
O,0,-2.7893700259,-1.2686734313,0.0609084009  
O,0,1.4159235936,-1.6375617462,-0.8011662467  
N,0,-0.6432263753,0.3526062682,-0.1220297459  
N,0,2.7671900321,1.4584162056,-0.0472943871  
N,0,2.8864240206,0.1592658336,-0.5172636505  
C,0,-6.7579942209,-1.8596781585,-0.2623243694  
H,0,-7.1056015184,-1.7021967828,-1.289459768  
H,0,-6.9117226777,-2.9016817539,0.016414198  
H,0,-7.3231575252,-1.213532156,0.4187278624  
C,0,-4.908451428,-0.3990936368,-0.445391313  
C,0,-5.6850358297,0.6764129433,-0.8501183879  
H,0,-6.7586308554,0.5614580775,-0.9463586687  
C,0,-5.1035470334,1.9229093892,-1.1404535085  
H,0,-5.7405000325,2.7408294082,-1.4593068741  
C,0,-3.7446322605,2.1033660591,-1.0300401944  
H,0,-3.2875659607,3.0599551546,-1.2622216883  
C,0,-2.9263170297,1.0323331217,-0.6024744716  
C,0,-3.5024136716,-0.2292602606,-0.3033562063  
C,0,-1.5171500223,1.2152575456,-0.5743207043

H,0,-1.1187696091,2.1387585508,-0.9981869296  
 C,0,0.7235247779,0.5931249397,-0.1611263698  
 C,0,1.4536024136,1.7218961291,0.1387219226  
 C,0,1.6414419688,-0.4547362372,-0.549340185  
 C,0,0.9252347728,3.0622327077,0.5776315526  
 O,0,1.8657830937,3.6603901693,1.4097145846  
 O,0,0.6647688433,3.7836838142,-0.5968278546  
 H,0,-0.0088487845,2.8819718571,1.1310004614  
 C,0,3.7485572406,2.4362029594,-0.5109065414  
 H,0,4.7481081716,2.1074911371,-0.2283158611  
 H,0,3.6856100877,2.542469598,-1.5977587269  
 H,0,3.5254166212,3.3808905416,-0.0212811036  
 C,0,4.1240823561,-0.5298871664,-0.4419727157  
 C,0,4.9556300157,-0.3711547587,0.6677520086  
 H,0,4.6563966313,0.283546299,1.4807542476  
 C,0,6.1581138457,-1.0688196388,0.7196031673  
 H,0,6.8122068624,-0.9424481227,1.5767754865  
 C,0,6.5119222568,-1.9375361264,-0.3112115435  
 H,0,7.4474392199,-2.4861375388,-0.2617852703  
 C,0,5.663524869,-2.1022840819,-1.4042306777  
 H,0,5.9355412648,-2.7780526588,-2.2091507263  
 C,0,4.4702962829,-1.3906189872,-1.4820589083  
 H,0,3.8087219193,-1.49746884,-2.3344158022  
 O,0,-0.7483662963,-0.8706296635,2.4359735818  
 O,0,0.3397825348,-1.3140991519,1.9280931516  
 H,0,0.1167820547,4.5471774427,-0.3740201948  
 H,0,1.4351221372,4.3529022064,1.9236444334

Sum of electronic and zero-point Energies=,, -2806.024509  
 Sum of electronic and thermal Energies=,,, -2805.996278  
 Sum of electronic and thermal Enthalpies=,,, -2805.995334  
 Sum of electronic and thermal Free Energies=,,, -2806.085517

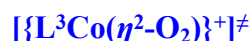

Co,,,,-1.77996200,1.55040500,0.29158800  
 O,-5.46269400,-0.62113700,1.27284600  
 O,-3.08875300,0.39940300,0.84410800  
 O, 1.30175000,-2.08178700,-0.40938500  
 N,-0.62162100,0.21731900,-0.33878100  
 N, 2.93555500,0.93829700,-0.05255000  
 N, 2.91164500,-0.43458500,-0.22593600  
 C,-6.75227700,-1.15104700,1.51085200  
 C,-4.68334900,-1.26423300,0.37526500  
 C,-5.04434800,-2.39170900,-0.33811400  
 C,-4.15221300,-2.99116400,-1.25258100  
 C,-2.90052600,-2.46413700,-1.44119100  
 C,-2.50298900,-1.29802000,-0.73538700  
 C,-3.39684300,-0.67135600,0.17466100  
 C,-1.15464600,-0.87100100,-0.86024100  
 C, 0.77782100,0.31473000,-0.35353500  
 C, 1.62685100,1.37667100,-0.16780800  
 C, 1.62008200,-0.89662200,-0.36381300  
 C, 1.43859100,2.86603400,-0.06910200  
 O, 2.24306600,3.46968000,0.84078100  
 C, 3.99368100,1.62004400,-0.81332200  
 C, 4.02659200,-1.21999300,0.15264000  
 C, 4.83600500,-0.81908900,1.21732600  
 C, 5.93220800,-1.59954100,1.57065300

C, 6.20673100,-2.78038400,0.88392700  
C, 5.38392500,-3.17661300,-0.16880600  
C, 4.29732000,-2.39559600,-0.54871100  
O,-2.58401900,2.67596400,-0.63557800  
O,-0.78680900,3.04318900,-0.18507800  
O, 1.51713200,3.56485200,-1.22977800  
H,-6.69985700,-2.17481000,1.90064100  
H,-7.21191100,-0.50415000,2.25831100  
H,-7.36363900,-1.14331900,0.60037800  
H,-6.02751800,-2.82837000,-0.20132100  
H,-4.46565100,-3.87784500,-1.79352100  
H,-2.19671500,-2.92966800,-2.12503100  
H,-0.49145200,-1.54146000,-1.39835400  
H, 2.38217700,2.88463600,1.59840800  
H, 4.95461800,1.19481400,-0.52526600  
H, 3.83794300,1.49796100,-1.88956700  
H, 3.98451100,2.67500300,-0.54753200  
H, 4.59965600,0.08934000,1.76258700  
H, 6.56578600,-1.28644600,2.39485900  
H, 7.05936000,-3.38958300,1.16770000  
H, 5.59439500,-4.09419300,-0.70978300  
H, 3.65931200,-2.68932500,-1.37364600  
H, 0.65531400,3.44902700,-1.66086800  
H, 0.21051500,3.03707500,0.37040600

Sum of electronic and zero-point Energies=, , -2805.956911  
Sum of electronic and thermal Energies=, , , -2805.929865  
Sum of electronic and thermal Enthalpies=, , , -2805.928921  
Sum of electronic and thermal Free Energies=, , , -2806.015337

### [L<sup>4</sup>Co(OH)]

Co, 0, 1.6146455936, 0.1981777022, -1.5409171484  
H, 0, 1.1256616862, 2.1264619352, -2.5047320888  
O, 0, 1.8151606066, 1.8974797499, -1.8652238501  
O, 0, 5.7058882578, -0.3502308553, -0.0534341492  
O, 0, 3.1846167117, -0.1655233278, -0.7342914419  
O, 0, 0.3360371081, -0.0009153479, -2.8479892713  
O, 0, -1.6985106392, -0.2614004185, -3.7210110318  
O, 0, -1.6359698497, 0.3409791691, 2.0950504349  
N, 0, 0.5711218498, 0.0654286079, -0.0473139455  
N, 0, -3.0108012187, 0.2931602015, 0.224102814  
N, 0, -2.8535950863, 0.1083771651, -1.1413460801  
C, 0, 7.0689425857, -0.4353755777, 0.2901526404  
H, 0, 7.4125243537, 0.4712250646, 0.8052901714  
H, 0, 7.6110624377, -0.5411115556, -0.649960468  
H, 0, 7.2722120665, -1.3080189917, 0.9248503512  
C, 0, 4.8195799299, -0.204641613, 0.9512798944  
C, 0, 5.1252867591, -0.1461498934, 2.2971818834  
H, 0, 6.1584319612, -0.2116518808, 2.6203935486  
C, 0, 4.1131745065, 0.0016455259, 3.2702084863  
H, 0, 4.3904654068, 0.0430582777, 4.3183457668  
C, 0, 2.7985028019, 0.0869694687, 2.89522465  
H, 0, 2.0105186275, 0.1937728172, 3.6346472376  
C, 0, 2.4481334805, 0.0379642712, 1.520023059  
C, 0, 3.4570819292, -0.0997331053, 0.5301689135  
C, 0, 1.0789833883, 0.0777102048, 1.1703925432  
H, 0, 0.3471278237, 0.1140872984, 1.9800625179  
C, 0, -0.8095495713, 0.1550758415, -0.2048630762

C,0,-1.7829349748,0.2881778361,0.8777386885  
C,0,-1.5046674969,0.0799766595,-1.385312901  
C,0,-0.9583482706,-0.0701169587,-2.7714958924  
C,0,-3.7686427885,0.8679120774,-1.9947861802  
H,0,-4.794400648,0.5854266872,-1.7579736528  
H,0,-3.5328984721,0.6005304111,-3.0230798033  
H,0,-3.6399968657,1.944476843,-1.8339180153  
C,0,-4.2480025576,0.0002934803,0.8443090032  
C,0,-5.0874189285,-0.9794182765,0.3095196388  
H,0,-4.7766419963,-1.5293613193,-0.5734913358  
C,0,-6.3017088349,-1.2506014323,0.9301037801  
H,0,-6.95657912,-2.0090650027,0.5116639708  
C,0,-6.667255302,-0.5704044295,2.088868733  
H,0,-7.6130536086,-0.7905979807,2.5744172227  
C,0,-5.8120577019,0.3888963499,2.62536484  
H,0,-6.0884458864,0.9187488547,3.5319715868  
C,0,-4.6045767882,0.6882957354,2.0043922868  
H,0,-3.9313451461,1.4311302114,2.4144883587

Sum of electronic and zero-point Energies=, , -2729.995279  
Sum of electronic and thermal Energies=, , , -2729.970100  
Sum of electronic and thermal Enthalpies=, , , -2729.969156  
Sum of electronic and thermal Free Energies=, , , -2730.050963

### [L<sup>1</sup>L<sup>4</sup>Co]

Co,0,-0.45309759,-0.398273017,0.9792625851  
O,0,-1.7398302381,-3.082758506,-2.2472624037  
O,0,-1.0238403379,-1.6840556363,-0.22357136  
O,0,0.1485666262,1.0368768627,2.2219328137  
O,0,3.6847215478,-1.9437568951,1.3699622514  
O,0,1.3165360567,-1.0019280059,0.8932963773  
O,0,-2.228063445,0.0426929318,1.4524658418  
O,0,-4.2615429255,0.9091471794,1.2445747132  
O,0,-0.7314689075,2.3507920626,-3.1600325135  
N,0,-0.5624201094,-1.5617957121,2.5284118988  
N,0,0.5184630367,1.0977114618,4.5337868306  
N,0,0.5228708053,0.1318003901,5.5438138297  
N,0,-0.3058868045,0.8046410109,-0.5080609806  
N,0,-2.9396597856,2.3202928869,-2.4457490687  
N,0,-3.6329655491,1.9287633692,-1.3058255807  
C,0,-2.1121972553,-3.8219785281,-3.3821121996  
H,0,-2.0067155021,-3.1468154555,-4.2324894917  
H,0,-3.1543397646,-4.1651743202,-3.3212258562  
H,0,-1.4604190796,-4.6937327475,-3.5317151173  
C,0,-1.7766093764,-3.7162076868,-1.0530193257  
C,0,-2.1676773555,-5.0225578654,-0.8578138847  
H,0,-2.4764433563,-5.6261094117,-1.7045828661  
C,0,-2.1784425513,-5.5977765507,0.4330775615  
H,0,-2.4933252195,-6.628650482,0.556342708  
C,0,-1.7930311332,-4.8473307646,1.5087039384  
H,0,-1.7950364868,-5.2730049972,2.5093060121  
C,0,-1.3777953005,-3.4972224996,1.3480185001  
C,0,-1.362883804,-2.8932222535,0.0557118312  
C,0,-0.9861439402,-2.7872100887,2.5115196112  
H,0,-1.0620570185,-3.3312603555,3.4551047918  
C,0,-0.1841216634,-0.8459240708,3.6441946383  
C,0,0.0495583363,-1.0529778906,4.9748821069  
C,0,0.1470744378,0.5197392865,3.3604528735  
C,0,-0.1021016096,-2.2686543387,5.8177840164  
H,0,0.5375558172,-2.2181373473,6.7017897344

H,0,0.1946724321,-3.1547049741,5.2507374434  
H,0,-1.1379244007,-2.4130311323,6.146822292  
C,0,-0.1019876957,0.5906052293,6.785983592  
H,0,0.4192084467,1.4811436434,7.1393332057  
H,0,0.0067306441,-0.1918241397,7.5373333914  
H,0,-1.1643678371,0.819961024,6.6398276161  
C,0,1.2180454406,2.3165699904,4.6932945183  
C,0,2.324749474,2.3862028899,5.5404233761  
H,0,2.6641515592,1.4929958869,6.0551971557  
C,0,2.9921294283,3.5974255959,5.687679226  
H,0,3.8528342131,3.6552060416,6.3472158306  
C,0,2.5750264232,4.721544845,4.9801297836  
H,0,3.1047491436,5.6625826157,5.0914732063  
C,0,1.4804393104,4.6327900229,4.1233884157  
H,0,1.1537665806,5.5039614872,3.5639756914  
C,0,0.7871591097,3.4363264242,3.9816055859  
H,0,-0.0670218817,3.3581002651,3.3188838781  
C,0,4.9516540723,-2.4994831731,1.6039475885  
H,0,5.3758776048,-2.9469834374,0.6943892408  
H,0,4.8102712605,-3.2813555907,2.3523964316  
H,0,5.6612164151,-1.7551980152,1.9928087602  
C,0,3.6050472857,-0.9563504689,0.4408623825  
C,0,4.6755887745,-0.4320868778,-0.2535955864  
H,0,5.6762840837,-0.810902222,-0.0739335695  
C,0,4.4938526093,0.5955698883,-1.2034807199  
H,0,5.352582886,0.9868019634,-1.7390231258  
C,0,3.235069732,1.080569202,-1.4427648892  
H,0,3.0714134116,1.8640296073,-2.1779509212  
C,0,2.114005405,0.57063826,-0.7384032687  
C,0,2.275048382,-0.4632156423,0.218924591  
C,0,0.8346074232,1.0900479279,-1.0779341067  
H,0,0.7955604465,1.7785594158,-1.9228685382  
C,0,-1.4713811042,1.3185160558,-1.0594956836  
C,0,-1.5833873881,2.0195979265,-2.3405016241  
C,0,-2.7194160748,1.2735680888,-0.5035236879  
C,0,-3.1303844397,0.7039056476,0.8162363254  
C,0,-4.92873939,1.2980900331,-1.5724163287  
H,0,-5.570373657,2.007974608,-2.0959553995  
H,0,-5.3564650033,1.0482475819,-0.6030450741  
H,0,-4.8022373006,0.3978293602,-2.1858237504  
C,0,-3.4738968447,3.3263952156,-3.2769557005  
C,0,-4.3940708159,4.2468939866,-2.7674483409  
H,0,-4.6725956009,4.1975498043,-1.719595727  
C,0,-4.9206483206,5.2255667907,-3.6031802599  
H,0,-5.6381946572,5.9364724555,-3.2035754687  
C,0,-4.520880704,5.3069640548,-4.9342957557  
H,0,-4.9300569725,6.076533016,-5.5819782773  
C,0,-3.5884921771,4.3973326975,-5.4274336877  
H,0,-3.266235766,4.4562003789,-6.4630429277  
C,0,-3.067483916,3.3995533814,-4.6116388739  
H,0,-2.338087846,2.692040349,-4.9853230522

Sum of electronic and zero-point Energies=,, -3777.476445  
Sum of electronic and thermal Energies=,,, -3777.430370  
Sum of electronic and thermal Enthalpies=,,, -3777.429426  
Sum of electronic and thermal Free Energies=,,, -3777.558508

### **List of authors in Ref. 50**

Gaussian 09, Revision A.02, Frisch, M. J.; Schlegel, H. B.; Scuseria, G. E.; Robb, M. A.; Cheeseman, J. R.; Zakrzewski, V. G.; Montgomery, J. A.; Vreven, T.; Kudin, K. N.; Burant, J. C.; Millan, J. M.; Iyengar, S. S.; Tomasi, J.; Barone, V.; Mennucci, B.; Cossi, M.; Scalmani, G.; Rega, N.; Petersson, G. A.; Nakatsuji, H.; Hada, M.; Ehara, M.; Toyota, K.; Fukuda, R.; Hasegawa, J.; Ishida, M.; Nakajima, T.; Honda, Y.; Kitao, O.; Nakai, H.; Klene, M.; Li, X.; Knox, J. E.; Hratchian, H. P.; Cross, J. B.; Adamo, C.; Jaramillo, J.; Gomperts, R.; Stratmann, R. E.; Yazyev, O.; Austin, A. J.; Cammi, R.; Pomelli, C.; Ochterski, J. W.; Ayala, P. Y.; Morokuma, K.; Voth, G. A.; Salvador, P.; Dannenberg, J. J.; Zakrzewski, V. G.; Dapprich, S.; Daniels, A. D.; Strain, M. C.; Farkas, O.; Malick, D. K.; Rabuck, A. D.; Raghavachari, K.; Foresman, J. B.; Ortiz, J. V.; Cui, Q.; Baboul, A. G.; Clifford, S.; Cioslowski, J.; Stefanov, B. B.; Liu, G.; Liashenko, A.; Piskorz, P.; Komaromi, I.; Martin, R. L.; Fox, D. J.; Keith, T.; Al-Laham, M. A.; Peng, C. Y.; Nanayakkara, A.; Challacombe, M.; Gill, P. M. W.; Johnson, B.; Chen, W.; Wong, M. W.; Gonzalez, C.; Pople, J. A. Gaussian, Inc., Wallingford CT, 2009
